# Small molecule inhibition of apicomplexan FtsH1 disrupts plastid biogenesis in human pathogens

Katherine Amberg-Johnson<sup>1,3</sup>, Sanjay B. Hari<sup>4</sup>, Suresh M. Ganesan<sup>5</sup>, Hernan A. Lorenzi<sup>6</sup>, Robert T. Sauer<sup>4</sup>, Jacquin C. Niles<sup>5</sup>, Ellen Yeh<sup>1,2,3,\*</sup>

<sup>1</sup>Department of Biochemistry, <sup>2</sup>Pathology, and <sup>3</sup>Microbiology and Immunology, Stanford Medical School

<sup>4</sup>Department of Biology, Massachusetts Institute of Technology

<sup>5</sup>Department of Biological Engineering, Massachusetts Institute of Technology

<sup>6</sup>Department of Infectious Disease, The J. Craig Venter Institute

\*Corresponding author

**The malaria parasite *Plasmodium falciparum* and related apicomplexan pathogens contain an essential plastid organelle, the apicoplast, which is a key anti-parasitic target. Derived from secondary endosymbiosis, the apicoplast depends on novel, but largely cryptic, mechanisms for protein/lipid import and organelle inheritance during parasite replication. These critical biogenesis pathways present untapped opportunities to discover new parasite-specific drug targets. We used an innovative screen to identify actinonin as having a novel mechanism-of-action inhibiting apicoplast biogenesis. Resistant mutation, chemical-genetic interaction, and biochemical inhibition demonstrate that the unexpected target of actinonin in *P. falciparum* and *Toxoplasma gondii* is FtsH1, a homolog of a bacterial membrane AAA+ metalloprotease. *Pf*FtsH1 is the first novel factor required for apicoplast biogenesis identified in a phenotypic screen. Our findings demonstrate that FtsH1 is a novel and, importantly, druggable antimalarial target. Development of FtsH1 inhibitors will have significant advantages with improved drug kinetics and multistage efficacy against multiple human parasites.**

## Introduction

There is an urgent need for antimalarials with novel mechanisms-of-action to combat resistance to frontline drugs. The apicoplast is a plastid organelle uniquely found in *Plasmodium* parasites that cause malaria and related apicomplexan pathogens<sup>1,2</sup>. Though non-photosynthetic, the apicoplast is required for the biosynthesis of essential metabolites in the organisms that retained it<sup>3-9</sup>. Acquired by a secondary eukaryote-eukaryote endosymbiosis, it utilizes bacterial and organellar pathways distinct from those of mammalian host cells. Given its unique and essential biology, the apicoplast is an ideal source of parasite-specific drug targets that minimize host off-target toxicity.

Despite its biomedical potential, development of broadly effective antimalarials targeting the apicoplast has met with significant roadblocks. The first class of apicoplast inhibitors to be identified was drugs like doxycycline, clindamycin, and chloramphenicol that block prokaryotic protein synthesis<sup>10,11</sup>. The antimalarial effects of these clinically-approved antibiotics were noticed well before they were shown to inhibit the bacterial-like ribosome in the apicoplast<sup>12</sup>. Unfortunately translation inhibitors cause a characteristic “delayed death” *in vitro* in which parasite growth inhibition occurs in the second replication cycle after drug treatment. The delayed effect is related to their

mechanism-of-action and is also seen with DNA replication and transcription inhibitors that block apicoplast gene expression. Delayed death manifests as a slow onset-of-action of translation inhibitors that limits their antimalarial efficacy and clinical use.

The next druggable targets in the apicoplast were several prokaryotic metabolic pathways. Fosmidomycin, an inhibitor of MEP isoprenoid precursor biosynthesis in the apicoplast, causes parasite growth inhibition in a single replication cycle *in vitro* and rapid parasite clearance in human clinical trials<sup>3,13-15</sup>. Unfortunately initial parasite clearance is followed by recrudescence infections in 50% of patients. These treatment failures have brought into question the clinical utility of fosmidomycin and other MEP inhibitors. Yet despite the expectation that the apicoplast would serve many essential functions, we showed that only isoprenoid precursor biosynthesis is required during the symptomatic blood stage of *Plasmodium*<sup>8</sup>. The apicoplast's limited function in blood-stage *Plasmodium* precludes opportunities to target alternative metabolic pathways.

The pipeline for essential and druggable apicoplast targets has run dry. New approaches are needed to identify drug targets that avoid the known liabilities of targeting apicoplast gene expression and metabolism. Until now, identification of drug targets in the apicoplast has been based on conserved bacterial and primary chloroplast pathways whose functions can be inferred from model organisms. However, many essential pathways for protein/lipid import into the apicoplast and organelle inheritance during parasite replication will be unique to secondary plastids and evolutionarily divergent from model eukaryotic biology<sup>16,17</sup>. Drug targets in these organelle biogenesis pathways are likely to be 1) essential to parasite survival, even in the context of the apicoplast's drastically reduced metabolic function, 2) required for all proliferative stages of the parasite life cycle, and 3) conserved across apicomplexan parasites. Thus apicoplast biogenesis represents a promising but unexplored frontier in antimalarial drug discovery.

While forward genetic screens have been extremely powerful in uncovering novel cellular pathways in model organisms, they are not currently tractable in *Plasmodium*. To circumvent these limitations, we took a chemical-genetic approach from phenotypic screening to target identification. We first identified the natural product actinonin as a novel inhibitor of apicoplast biogenesis. We then uncovered the essential role of the membrane metalloprotease FtsH1 in organelle biogenesis in apicomplexan pathogens. FtsH1 is a druggable target in apicoplast biogenesis that offers advantages over the mechanisms-of-action of existing apicoplast inhibitors and has a ready hit compound to pursue drug development.

## Results

### Identification of a novel apicoplast biogenesis inhibitor

We screened >400 growth-inhibitory antimalarial compounds with unknown mechanisms-of-action to identify novel inhibitors of apicoplast biogenesis (Table 1-Source Data 1)<sup>18-22</sup>. Our selection criteria aimed to identify compounds that 1) caused parasite growth inhibition (essential target) in a single replication cycle (avoiding delayed death), 2) were specific in their disruption of the apicoplast, and 3) resulted in loss of the apicoplast during parasite replication. This unique inhibition phenotype distinguished selected compounds from known apicoplast gene expression or metabolism inhibitors, ensuring discovery of a novel class of inhibitors.

A single natural product antibiotic, actinonin, matched our criteria (Figure 1a)<sup>23</sup>. Consistent with its reported antimalarial activity, actinonin caused *P. falciparum* growth inhibition in a single replication cycle ( $EC_{50} = 3.2 \mu M$ ; 95% CI 2.5-4.1)<sup>19,24</sup>. Because isoprenoid precursor biosynthesis is the only essential function of the apicoplast in blood-stage *P. falciparum*, any disruption of the apicoplast, including complete loss of the organelle, can be rescued by addition of the isoprenoid precursor, isopentenyl pyrophosphate (IPP), in the growth media<sup>8</sup>. Indeed actinonin's  $EC_{50}$  shifted nearly 20-fold in the presence of IPP to  $61 \mu M$  (95% CI 50-75). Although the translation inhibitor chloramphenicol also caused growth inhibition rescued by IPP, parasite growth inhibition and resulting apicoplast biogenesis defects were delayed by one replication cycle following drug treatment (Figure 1- Figure Supplement 1b; Figure 1- Figure Supplement 2a,c). Compared to chloramphenicol, actinonin clearly had more rapid antimalarial activity. These results demonstrate that actinonin specifically inhibits the apicoplast without a delayed death phenotype (Figure 1b; Figure 1- Figure Supplement 1a; Table 1- Source Data Table 1).

Previously actinonin was observed to cause a block in the morphologic development of the apicoplast during parasite replication<sup>24</sup>. However, these defects were observed without IPP growth rescue when parasite replication was also inhibited. Absent IPP rescue, the MEP inhibitor fosmidomycin also showed a block in apicoplast development. Based on the observed similarities in their inhibition phenotype, the authors concluded that actinonin, like fosmidomycin, inhibited apicoplast metabolism. We sought to clarify these earlier observations using IPP rescue to distinguish between specific apicoplast defects caused by the inhibitor and nonspecific defects observed in a non-replicating parasite. Using quantitative PCR (qPCR) to detect the apicoplast genome and microscopy to localize an apicoplast-targeted GFP, we show that actinonin-treated *P. falciparum*, rescued for growth by IPP, no longer replicated their apicoplast genome and produced daughter parasites lacking apicoplasts, consistent with a defect in apicoplast biogenesis (Figure 1c-d; Figure 1- Figure Supplement 2a,e)<sup>8</sup>. In contrast, both the copy number of the apicoplast genome and apicoplast development were unaffected by fosmidomycin treatment under IPP rescue, indicating that the previously reported apicoplast biogenesis defects were nonspecific (Figure 1- Figure Supplement 1b; Figure 1- Figure Supplement 2a,d). Taken together, actinonin's inhibition phenotype distinguishes it from known inhibitors that disrupt apicoplast gene expression and metabolism and indicates that it has a novel mechanism-of-action in organelle biogenesis (Figure 1- Figure Supplement 1b; Figure 1- Figure Supplement 2).

### **Actinonin is unlikely to inhibit the peptide deformylase in *Plasmodium* parasites**

To identify actinonin's molecular target, we first took a candidate-based approach. In bacteria and mammalian mitochondria, actinonin potently inhibits a peptide deformylase (PDF) which catalyzes the co-translational removal of the formyl group from nascent chains<sup>25</sup>. The apicoplast translation machinery is prokaryotic in origin and therefore contains a PDF. Previously actinonin was shown to inhibit the enzymatic activity of purified *P. falciparum* PDF with a reported  $IC_{50} = 2.5 \mu M$ <sup>26</sup>. The potency of this inhibition is  $10^{2-3}$  fold less than those reported for *E. coli* or human PDF<sup>25,27,28</sup>. Given the role of Pdf in apicoplast translation, its inhibition is expected to give a delayed death phenotype as observed with other translation inhibitors, whereas we clearly

observed growth inhibition in a single replication cycle (Figure 1). Puzzled by this inconsistency, we used both genetic and chemical approaches to ascertain whether the *PfPDF* is the target of actinonin.

In bacteria, resistance to actinonin is conferred by overexpression of PDF<sup>29</sup>. We constructed a *P. falciparum* strain containing a second copy of *PfPDF*-myc in which expression was regulated by tetR-DOZI-binding aptamer sequences<sup>30</sup>. As expected, *PfPDF*-myc expression was observed in the presence of anhydrotetracycline, which disrupts the tetR-DOZI repressor-aptamer interaction (Figure 1-Figure Supplement 3a). We assessed the import of overexpressed *PfPDF*-myc into the apicoplast by determining its apicoplast-dependent protein cleavage. Luminal apicoplast proteins, including *PfPDF*, contain an N-terminal transit peptide sequence that is required for trafficking to the apicoplast and is cleaved upon import<sup>16</sup>. In normal parasites, *PfPDF*-myc was detected as a majority processed and minority unprocessed protein (Figure 1-Figure Supplement 3a-b). In IPP-rescued parasites lacking their apicoplast, *PfPDF*-myc accumulates as only the unprocessed protein (Figure 1-Figure Supplement 3b)<sup>8</sup>. These results indicate that *PfPDF*-myc is properly trafficked. Contrary to what is seen in bacteria, *PfPDF*-myc overexpression did not confer actinonin resistance indicating that *PfPDF* may not be the target of actinonin (Figure 1-Figure Supplement 3c). Because the lack of actinonin resistance may also have been due to insufficient overexpression or nonfunctional *PfPDF*-myc, we attempted to generate a strain with *pdf* expression regulated at the endogenous loci but were unable obtain viable parasites in two separate transfections performed in parallel with successful positive controls.

We also assessed whether the actinonin target functions downstream of the ribosome, as is expected for *PfPDF*. In mitochondria, translation inhibitors suppress the effects of actinonin since a block in translation supercedes a block in PDF activity<sup>31</sup>. Similarly, we expected that if PDF was the target of actinonin leading to growth inhibition in a single replication cycle, then co-treatment with chloramphenicol would result in a delayed death phenotype, whereby translation inhibition would mask the effects of PDF inhibition. Surprisingly, chloramphenicol did not suppress the effects of actinonin (Figure 1-Figure Supplement 3d). Taken together, our results indicate that 1) actinonin does not cause delayed death as would be expected for *PfPDF* inhibition, 2) overexpression of *PfPDF* did not confer actinonin resistance, and 3) the effect of actinonin was not suppressed by inhibition of the ribosome upstream of *PfPDF*. These results are inconsistent with *PfPDF* being the target of actinonin.

### **Actinonin-resistant *T. gondii* contain a mutation in *TgFtsH1***

Because the target of actinonin in *P. falciparum* did not appear to be conserved in model organisms, we turned to an unbiased approach. Our collaborators and we independently attempted to isolate actinonin-resistant *P. falciparum* but failed using multiple selection methods, including chemical mutagenesis, that successfully selected resistance against other compounds (Prof. David Fidock, personal communication, July 2017)<sup>21,22</sup>. Therefore, we turned to *Toxoplasma gondii*, a related apicomplexan parasite, which contains an apicoplast of the same evolutionary origin, because it is easier to grow to large numbers and to genetically modify.

To determine whether actinonin disrupts apicoplast biogenesis in *T. gondii*, we characterized its inhibition phenotype. Curiously, *T. gondii* also shows a delayed death



phenotype with apicoplast translation inhibition, whereby drug treatment in the first lytic cycle results in parasite growth inhibition in the second cycle<sup>10</sup>. However, the mechanism underlying delayed death in *T. gondii* is distinct from that in *Plasmodium*. Delayed death in *T. gondii* is associated with defects in apicoplast biogenesis and formation of parasites that lack apicoplasts during the first lytic cycle<sup>32-34</sup>. Though these “apicoplast-minus” parasites are viable in the first lytic cycle, they cannot replicate in the second lytic cycle. (In contrast, *Plasmodium* parasites treated with translation inhibitors exhibit apicoplast biogenesis defects in the second replication/lytic cycle, wherein loss of the apicoplast immediately blocks parasite replication<sup>11</sup>.) Consistent with an apicoplast biogenesis defect in *T. gondii*, actinonin showed delayed death growth inhibition ( $EC_{50}$ = 14  $\mu$ M; 95% CI 13-14) with formation of apicoplast-minus parasites during drug treatment (Figure 2a; Figure 2-Figure Supplement 1a)<sup>32</sup>.

Because actinonin disrupted apicoplast biogenesis in both *T. gondii* and *P. falciparum*, suggesting a common target, we selected actinonin-resistant *T. gondii* at a concentration equal to  $3 \times EC_{50}$  (Figure 2b; Figure 2-Figure Supplement 1b). We determined the whole-genome sequences for eight independently selected clones (Table 2-Source Data 1). Remarkably, five clones, which showed between 3.5 and 4-fold shift in the actinonin  $EC_{50}$ , harbored two identical mutations (Table 2-Source Data 1). The first mutation encoded a N805S variant in the metalloprotease domain of the membrane-bound AAA+ protease *TgFtsH1* (TGGT1\_259260) (Figure 2d; Table 2-Source Data 1). The second was found in a RING finger domain-containing protein of unknown function (TGGT1\_232160), leading to a G404R mutation outside of the catalytic domain (Table 2-Source Data 1). Though both candidates may be involved in the mechanism of resistance to actinonin, *TgFtsH1* was more compelling as the actinonin target for three reasons. First, *TgFtsH1* localizes to the apicoplast<sup>35</sup>. Second, actinonin is a peptide mimetic containing a metal-binding hydroxamic acid, a class of molecules that typically binds metalloproteases in their active site (Figure 1a)<sup>25,36</sup>. Third, the N805S variant of *TgFtsH1* is within the metalloprotease domain (Figure 2d), raising the possibility that actinonin binding to the *TgFtsH1* metalloprotease active site may be prevented by this variant. Indeed, replacement of the endogenous *TgFtsH1* locus with the allele encoding *TgFtsH1(N805S)* caused a 3.5-fold shift in the actinonin  $EC_{50}$ , fully accounting for the resistance observed in the actinonin-resistant clones (Figure 2c). Notably growth inhibition at this higher actinonin concentration did not result in delayed death, suggesting that actinonin no longer bound FtsH1 and growth inhibition was the result of secondary targets (Figure 2-Figure Supplement 2b). In contrast, no increase in the actinonin  $EC_{50}$  was observed when the endogenous locus was replaced with the WT allele (Figure 2c). Taken together, the known metalloprotease binding of actinonin, the predicted metalloprotease activity of *TgFtsH1*, and the validated actinonin-resistant mutation in *TgFtsH1* support FtsH1 as the target of actinonin in *T. gondii*, providing a strong candidate for validation in *P. falciparum*.

### **C-terminal cleavage of the *P. falciparum* FtsH1 homolog is dependent on the apicoplast**

The *P. falciparum* genome contains three FtsH homologs. One of these, *PfFtsH1* (Pf3D7\_1239700) is most closely related to *TgFtsH1* by phylogenetic analysis<sup>37</sup>. Unlike *TgFtsH1*, *PfFtsH1* was previously reported to localize to mitochondria, not the

apicoplast<sup>37</sup>. However the same study reported that, like *TgFtsH1*, *PfFtsH1* undergoes processing. The mitochondrial localization was most clearly demonstrated for the C-terminally tagged fragment, but the localization of the N-terminal fragment containing the ATPase and protease domains was unclear. Proteins required for apicoplast biogenesis may localize to various cellular compartments outside of the apicoplast. For example, both the dynamin DrpA and Atg8 required for apicoplast biogenesis are cytoplasmic proteins, whereas apicoplast protein trafficking machinery is likely to exist in the ER<sup>32,34</sup>. Close association of the mitochondria and apicoplast has also been observed and may be important for organelle biogenesis<sup>38,39</sup>.

To clarify its localization and function, we constructed a *P. falciparum* strain in which the endogenous *PfFtsH1* locus was modified with a C-terminal FLAG epitope and 3' UTR tetR-DOZI-binding aptamer sequences for regulated expression<sup>30</sup>. We first sought to localize *PfFtsH1* with the C-terminal FLAG epitope. However only the FLAG-tagged Cas9 expressed in this strain was detected with no visible band corresponding to the size of *PfFtsH1*, consistent with the previous report that the C-terminus of the protein is cleaved (Figure 3-Figure Supplement 1a). *TgFtsH1* was proposed to be C-terminally cleaved in the apicoplast<sup>40</sup>. We hypothesized that if cleavage of *PfFtsH1* is a result of apicoplast localization, then IPP-rescued parasites lacking an apicoplast would retain an intact *PfFtsH1*-FLAG. Indeed, *PfFtsH1*-FLAG was detected in these apicoplast-minus parasites, indicating that C-terminal cleavage of *PfFtsH1* is dependent on the apicoplast (Figure 3-Figure Supplement 1a). This evidence strongly suggests that *PfFtsH1* traffics to the apicoplast, as has been shown for *TgFtsH1*.

### **Knockdown of *PfFtsH1* disrupts apicoplast biogenesis**

Using the endogenously tagged and regulated *PfFtsH1* strain, we determined whether *PfFtsH1* is essential for apicoplast biogenesis. As expected, *PfFtsH1* expression was down-regulated when the tetR-DOZI repressor bound the aptamer sequences, and restored when anhydrotetracycline, which disrupts this interaction, was added (Figure 3a; Figure 3-Figure Supplement 1b)<sup>30</sup>. Upon downregulation of *PfFtsH1*, we observed a nearly 4-fold decrease in parasitemia after 3 replication cycles, compared to parasites expressing normal levels of *PfFtsH1* (Figure 3b; Figure 3-Figure Supplement 2a). This growth defect observed over multiple replication cycles reflected the slower kinetics of genetic regulation (compared to chemical inhibition) and partial knockdown, which has been reported using this regulation system<sup>30,41</sup>. Significantly, growth of *PfFtsH1* knockdown parasites was restored by addition of IPP (Figure 3b, Figure 3-Figure Supplement 2a). Finally, we confirmed that loss of *PfFtsH1* led to apicoplast loss. Using qPCR, we observed a steady decrease in the apicoplast:nuclear genome ratio upon knockdown of *PfFtsH1* under IPP rescue compared to control parasites, consistent with loss of the apicoplast<sup>8</sup> (Figure 3c). These results demonstrate that *PfFtsH1* is required for apicoplast biogenesis and is the first molecular player in apicoplast biogenesis identified in a phenotypic screen.

### **Knockdown of *FtsH1* results in specific hypersensitivity to actinonin**

Because knockdown of *PfFtsH1* phenocopies the apicoplast biogenesis defect of actinonin, we sought to determine whether actinonin functionally inhibits *PfFtsH1*. Although we identified an actinonin-resistant mutation in *TgFtsH1* encoding an N805S

variant, this residue is not conserved between the *P. falciparum* and *T. gondii* homologs and does not allow the same resistant mutation to be tested<sup>35</sup>. As an alternative, we down-regulated *PfFtsH1* expression and observed a 58-fold decrease in the actinonin EC<sub>50</sub> upon knockdown of *PfFtsH1* expression (Figure 3d). To ensure that the decrease in *PfFtsH1* did not cause confounding effects, growth inhibition was measured over a single replication cycle during which *PfFtsH1* downregulation did not significantly affect parasite growth (Figure 3b; Figure 3-Figure Supplement 2b). Thus reduced levels of *PfFtsH1* caused hypersensitivity to actinonin, analogous to drug-induced haploinsufficiency which is commonly used in yeast to identify drug mechanism-of-action<sup>42,43</sup>. Importantly, *PfFtsH1* downregulation did not alter the EC<sub>50</sub> of fosmidomycin, which blocks apicoplast metabolism, or chloramphenicol, which causes delayed biogenesis defects. These negative controls indicate that the functional interaction of *PfFtsH1* with actinonin is specific and is not observed with other inhibitors that disrupt apicoplast metabolism or biogenesis (Figure 3-Figure Supplement 2c-d). This specific and strong chemical-genetic interaction indicates that *PfFtsH1* is required for actinonin's mechanism-of-action.

### Actinonin inhibits *PfFtsH1* activity *in vitro*

After our results revealed a specific and biologically relevant functional interaction between actinonin and *PfFtsH1* in intact parasites, we sought to determine whether actinonin directly inhibits *PfFtsH1* enzymatic activity *in vitro*. *PfFtsH1*<sub>91-612</sub> lacking its transmembrane domain was expressed as a soluble fusion protein and purified using tandem affinity tags (Figure 4a; Figure 4-Figure Supplement 1). As expected, the purified enzyme showed ATPase and protease activity (Figure 4-Figure Supplement 1; Figure 4b-c). Specific mutations reported to inactivate the ATPase (E249Q) or protease (D493A) domains in other AAA+ proteases<sup>44,45</sup> abolished these respective activities in the *PfFtsH1* construct (Figure 4a-c)<sup>44,45</sup>. Notably, actinonin inhibited *PfFtsH1* protease activity with an IC<sub>50</sub> ≤ 0.6 μM (Figure 4d) (sensitivity limitations of the assay precluded a more accurate number). The metal-binding hydroxamate group of actinonin is known to be very important for inhibition of peptide deformylase<sup>25</sup>. To determine the contribution of the hydroxamate group to the inhibition of *PfFtsH1*, we tested its inhibition by actinamide, an analog in which the hydroxamate is replaced with an amide. Indeed, actinamide was at least 10-fold less potent against *PfFtsH1* (IC<sub>50</sub>=7.3 μM; Figure 4e)<sup>27</sup>. The decreased enzymatic inhibition correlated with a substantial decrease in parasite growth inhibition compared to actinonin, although growth inhibition by actinamide was still dependent on *PfFtsH1* levels (Figure 4d-e). Hence, the direct inhibition of *PfFtsH1* enzymatic activity by actinonin demonstrates that *PfFtsH1* is its target in *P. falciparum*.

### Discussion

We identified actinonin as a novel inhibitor of apicoplast biogenesis based on its distinct apicoplast inhibition phenotype compared to known inhibitors. Because the phenotypic screen and the mechanism-of-action elucidation were unbiased, the identification of apicomplexan FtsH1 as actinonin's molecular target was surprising in a number of ways. First, the actinonin target in bacteria and mammalian mitochondria is PDF, and *PfPDF* was presumed to be the target in *Plasmodium* parasites<sup>25,27</sup>. However, our functional assays did not support this hypothesis. Identification of antimalarial drug

targets based on homology with known drug targets in distantly related organisms can be misleading. For example, the misidentification of fatty acid enzyme *PfFabI* as the target of triclosan, based on its inhibition of bacterial homologs, led to failed drug development programs when fatty acid biosynthesis was later shown to be dispensable in blood-stage *Plasmodium*<sup>5,6,46</sup>. Instead, consistent with actinonin's chemical structure, both bacterial PDF and apicomplexan FtsH1 are metalloproteases. The target in each organism will depend on its biological activity in the cell and relative binding affinity to actinonin.

Second, though *P. falciparum* and *T. gondii* share conserved apicoplast biogenesis pathways, it was uncertain whether *T. gondii*'s tractable culture system and genetics could be leveraged to identify the actinonin target in *P. falciparum*. Fortunately, actinonin caused apicoplast biogenesis defects in both *P. falciparum* and *T. gondii* supporting a common mechanism-of-action. Specifically, actinonin-treated *P. falciparum* formed "apicoplast-minus parasites" with IPP rescue while *T. gondii* formed them spontaneously<sup>8,47</sup>. Importantly we show that, unlike in *T. gondii*, disruption of apicoplast biogenesis does not necessarily lead to delayed death in *P. falciparum*. Based on our experience, drug resistance selection in *T. gondii* to aid in elucidating antimalarial mechanism-of-action, where resistant *P. falciparum* cannot be selected, is a powerful approach. The evidence for FtsH1 as the common actinonin target in these two related organisms greatly strengthens the target identification.

Third, we identified an actinonin-resistant mutation in *TgFtsH1* but, since *P. falciparum* contains 3 FtsH homologs, it was not initially clear which of them was the *TgFtsH1* ortholog. Almost all eukaryotes contain at least two FtsH homologs located in the mitochondrial inner membrane: The i-AAA has a single transmembrane domain with catalytic domains facing the intermembrane space, while the m-AAA has two transmembrane domains and faces the matrix<sup>48</sup>. PF3D7\_1119600 is the only homolog predicted to have two transmembrane domains and phylogenetically clusters with human and yeast m-AAA<sup>37</sup>. Of the two homologs with a single transmembrane domain, PF3D7\_1464900 is more closely related to mitochondrial i-AAA from human and yeast, leaving *PfFtsH1* as the apparent ortholog of *TgFtsH1*<sup>37</sup>. However this pairing contradicted localization studies assigning *TgFtsH1* to the apicoplast and *PfFtsH1* to the mitochondria<sup>35,37</sup>. *TgFtsH1* was shown to undergo C-terminal processing associated with its trafficking to the apicoplast<sup>40</sup>. Similarly, we showed that *PfFtsH1* undergoes C-terminal processing dependent on the presence of the apicoplast. This shared functional phenotype strongly suggests that *PfFtsH1* also traffics to the apicoplast. Therefore, the most parsimonious assignment for the three *Plasmodium* FtsH homologs is PF3D7\_1119600 and PF3D7\_1464900 are mitochondrial and *PfFtsH1* is in the apicoplast. Unfortunately, we were unable to generate endogenously-tagged knockdown strains of either PF3D7\_1119600 or PF3D7\_1464900 to perform localization and functional studies (see Methods).

Finally, there are multiple potential metalloproteases in *P. falciparum* and *T. gondii* that may be inhibited by actinonin. However, our evidence demonstrates that the primary target of actinonin in these parasites, associated with its disruption of apicoplast biogenesis, is FtsH1. Using IPP rescue to gauge apicoplast specificity, we assayed for secondary targets in *P. falciparum* and detected a non-IPP rescuable target at an actinonin concentration 20-fold higher than that for its apicoplast-specific target (Figure 1-Figure Supplement 1a). Similarly, in *T. gondii*, the loss of "delayed death" growth inhibition



(and its associated formation of apicoplast-minus parasites) signified actinonin's inhibition of a secondary target at a concentration 3.5-fold greater than its specific inhibition of *TgFtsH1* (Figure 2-Figure Supplement 1b). Moreover, actinonin preferentially targets metalloproteases from MEROPS clan MA composed of structurally homologous proteins with a conserved metal-binding HEXXH motif and catalytic Glu<sup>49</sup>. Out of six metalloproteases predicted to localize to the apicoplast, only FtsH and PDF are in clan MA<sup>26,37,50–53</sup>. Curiously, *PfFtsH1* is the first FtsH homolog shown to be inhibited by a small molecule.

Overall, we conclude that apicomplexan FtsH1 is the target of actinonin based on 1) an actinonin-resistant N805S variant in *TgFtsH1*, 2) disruption of apicoplast biogenesis upon *PfFtsH1* knockdown, phenocopying actinonin's biogenesis defect, 3) specific actinonin-induced sensitization to *PfFtsH1* knockdown, and 4) *in vitro* inhibition of *PfFtsH1* protease activity by actinonin. The unpredicted outcome underscores the power of unbiased screens to uncover novel drug targets in unique but poorly characterized cellular pathways. As the first phenotypic screen for drug targets in essential apicoplast biogenesis pathways, the approach highlighted in our study provides a framework for similar screens in the future.

Our finding also presents an exciting opportunity for antimalarial drug discovery and clearly demonstrates that there are still untapped opportunities to target the apicoplast for antiparasitic therapy. FtsH1 inhibitors will have significant advantages over existing antimalarials that target apicoplast metabolism or gene expression. Whereas metabolic needs vary throughout the parasite lifecycle and even between the same stage of different *Plasmodium* species<sup>54,55</sup>, apicoplast biogenesis is required at every proliferative stage of the parasite lifecycle and is highly conserved among apicomplexan parasites. For example, apicoplast translation inhibitors have broad clinical application as malaria prophylaxis and a partner drug, in combination with faster-acting compounds, for acute malaria, toxoplasmosis, and babesiosis. In fact, the utility of these antibiotics as antiparasitics would be greater if not for their slow activity. Inhibition of FtsH1 retains all the benefits of targeting apicoplast biogenesis with no delay in the onset-of-action. Moreover, our inability to select actinonin-resistant *Plasmodium* contrasts with the ready selection of *in vitro* resistance against antibiotics and MEP inhibitors and indicates a lower likelihood of clinical resistance to FtsH1 inhibitors<sup>21,56–58</sup>. Taken together, FtsH1 inhibitors have potential for rapid onset, multi-stage efficacy against multiple parasitic infections, and minimal clinical resistance.

In addition to its promising biological properties, FtsH1 is a druggable target. There are clear precedents for active-site inhibitors of metalloproteases advancing as clinical candidates in human trials. Clinically tested inhibitors of human matrix metalloproteases (MMP; e.g. marimastat, rebimastat) and bacterial PDF (e.g. GSK1322322, LBM-415, BB83698) were also peptide mimetics with a metal-binding group<sup>59,60</sup>. Based on the development of MMP and PDF inhibitors, metalloprotease inhibitors require optimization for metabolic stability and selectivity. For example, hydroxamate-based inhibitors, such as actinonin, are labile to liver metabolism, which can be addressed by replacement of this metal-binding group with stable bioisosteres<sup>61</sup>. Similarly, selectivity depends on specific recognition of protein features beyond the active-site metal, which is shared by many metalloproteases. Notably, bacterial PDF inhibitors have shown excellent safety profiles in human clinical trials, demonstrating

that metal-chelating peptide mimetics can achieve selectivity for pathogen targets allowing for their use as acute treatment<sup>60</sup>. An alternative strategy is to identify small molecule binding pockets outside of the FtsH1 metalloprotease active site that may affect regulation of its protease activity<sup>59</sup>. Such small molecule regulation has been demonstrated for the functionally-related bacterial ClpP proteases<sup>62</sup>. Both the *in vitro* *Pf*FtsH1 activity assay and the *P. falciparum* FtsH1 knockdown strain reported in our study can be adapted to perform high-throughput screens for optimized FtsH1 inhibitors. Structure-function studies of *Pf*FtsH1 will also aid in design of active site and allosteric inhibitors. Importantly, optimization of *Pf*FtsH1 inhibitors will benefit enormously from a “piggyback” strategy to access compound libraries, counterscreens for off-target activity against human metalloproteases, and knowledge about drug properties of metalloprotease active-site inhibitors, which have already been established for bacterial PDF inhibitor programs<sup>60</sup>.

Finally, while molecular players involved in apicoplast biogenesis have been identified based on functional conservation and bioinformatics screens for apicoplast proteins<sup>63</sup>, apicomplexan FtsH1 is the first novel molecular player in apicoplast biogenesis identified in a phenotypic screen. Acquired by secondary endosymbiosis of an alga, the apicoplast is evolutionarily distinct. FtsH1’s role in organelle biogenesis is not conserved in homologs found in mitochondria or primary chloroplasts and likely represents a novel pathway unique to secondary endosymbionts in this parasite lineage<sup>17,32,64,65</sup>. FtsH homologs have broad substrate specificity to perform general degradation of misfolded membrane proteins<sup>48</sup>. However they have also been shown to catalyze the proteolysis of native cytosolic proteins under specific conditions critical for cellular regulation<sup>66</sup>. For example, the essential function of *E. coli* FtsH is its regulated proteolysis of LpxC, the key enzyme in lipopolysaccharide biosynthesis<sup>67</sup>. In *Bacillus subtilis*, FtsH-dependent degradation of SpoIVFA regulates spore differentiation<sup>68</sup>. Similarly, *Ec*FtsH also regulates the lysis-lysogeny decision by phage lambda by degrading a CII transcription factor<sup>69</sup> and regulates levels of intracellular Mg<sup>2+</sup> by degrading a Mg<sup>2+</sup> transporter MgtA<sup>70</sup>. Based on these regulatory functions of bacterial FtsH homologs, we propose that apicomplexan FtsH1 regulates the proteolysis of key apicoplast membrane protein(s) during parasite replication. Ongoing experiments to understand the molecular mechanism of FtsH1 are focused on identification of FtsH1 substrates. A candidate substrate is the RING finger domain-containing protein associated with actinonin-resistant *T. gondii*. FtsH1 offers a rare foothold into a novel apicoplast biogenesis pathway evolved from secondary endosymbiosis and will yield deeper insight into the molecular mechanisms of eukaryogenesis.

## References

1. McFadden, G. I., Reith, M. E., Munholland, J. & Lang-Unnasch, N. Plastid in human parasites. *Nature* **381**, 482 (1996).
2. Köhler, S. *et al.* A plastid of probable green algal origin in Apicomplexan parasites. *Science* **275**, 1485–1489 (1997).

- 458 3. Jomaa, H. *et al.* Inhibitors of the nonmevalonate pathway of isoprenoid  
459 biosynthesis as antimalarial drugs. *Science* **285**, 1573–1576 (1999).
- 460 4. Mazumdar, J., H Wilson, E., Masek, K., A Hunter, C. & Striepen, B. Apicoplast fatty  
461 acid synthesis is essential for organelle biogenesis and parasite survival in  
462 *Toxoplasma gondii*. *Proc. Natl. Acad. Sci. U. S. A.* **103**, 13192–13197 (2006).
- 463 5. Vaughan, A. M. *et al.* Type II fatty acid synthesis is essential only for malaria  
464 parasite late liver stage development. *Cell. Microbiol.* **11**, 506–520 (2009).
- 465 6. Yu, M. *et al.* The Fatty Acid Biosynthesis Enzyme FabI Plays a Key Role In the  
466 Development of Liver Stage Malarial Parasites. *Cell Host Microbe* **4**, 567–578  
467 (2008).
- 468 7. Nair, S. C. *et al.* Apicoplast isoprenoid precursor synthesis and the molecular  
469 basis of fosmidomycin resistance in *Toxoplasma gondii*. *J. Exp. Med.* (2011).  
470 doi:10.1084/jem.20110039
- 471 8. Yeh, E. & DeRisi, J. L. Chemical Rescue of Malaria Parasites Lacking an Apicoplast  
472 Defines Organelle Function in Blood-Stage *Plasmodium falciparum*. *PLoS Biol* **9**,  
473 e1001138 (2011).
- 474 9. Ke, H. *et al.* The heme biosynthesis pathway is essential for *Plasmodium*  
475 *falciparum* development in mosquito stage but not in blood stages. *J. Biol. Chem.*  
476 **289**, 34827–34837 (2014).
- 477 10. Fichera, M. E. & Roos, D. S. A plastid organelle as a drug target in apicomplexan  
478 parasites. *Nature* **390**, 407–409 (1997).

- 479 11. Dahl, E. L. *et al.* Tetracyclines specifically target the apicoplast of the malaria  
480 parasite *Plasmodium falciparum*. *Antimicrob. Agents Chemother.* **50**, 3124–3131  
481 (2006).
- 482 12. Geary, T. G. & Jensen, J. B. Effects of antibiotics on *Plasmodium falciparum* in  
483 vitro. *Am. J. Trop. Med. Hyg.* **32**, 221–225 (1983).
- 484 13. Oyakhirome, S. *et al.* Randomized controlled trial of fosmidomycin-clindamycin  
485 versus sulfadoxine-pyrimethamine in the treatment of *Plasmodium falciparum*  
486 malaria. *Antimicrob. Agents Chemother.* **51**, 1869–1871 (2007).
- 487 14. Lanaspá, M. *et al.* Inadequate Efficacy of a New Formulation of Fosmidomycin-  
488 Clindamycin Combination in Mozambican Children Less than Three Years Old  
489 with Uncomplicated *Plasmodium falciparum* Malaria. *Antimicrob. Agents*  
490 *Chemother.* **56**, 2923–2928 (2012).
- 491 15. Guggisberg, A. M. *et al.* Whole-Genome Sequencing to Evaluate the Resistance  
492 Landscape Following Antimalarial Treatment Failure With Fosmidomycin-  
493 Clindamycin. *J. Infect. Dis.* **214**, 1085–1091 (2016).
- 494 16. Waller, R. F. *et al.* Nuclear-encoded proteins target to the plastid in *Toxoplasma*  
495 *gondii* and *Plasmodium falciparum*. *Proc. Natl. Acad. Sci.* **95**, 12352–12357  
496 (1998).
- 497 17. Vaishnava, S. & Striepen, B. The cell biology of secondary endosymbiosis--how  
498 parasites build, divide and segregate the apicoplast. *Mol. Microbiol.* **61**, 1380–  
499 1387 (2006).
- 500 18. Spangenberg, T. *et al.* The Open Access Malaria Box: A Drug Discovery Catalyst  
501 for Neglected Diseases. *PLoS ONE* **8**, e62906 (2013).



- 502 19. Wiesner, J., Sanderbrand, S., Altincicek, B., Beck, E. & Jomaa, H. Seeking new  
503 targets for antiparasitic agents. *Trends Parasitol.* **17**, 7–8 (2001).
- 504 20. Dahl, E. L. & Rosenthal, P. J. Multiple Antibiotics Exert Delayed Effects against the  
505 *Plasmodium falciparum* Apicoplast. *Antimicrob Agents Chemother* **51**, 3485–  
506 3490 (2007).
- 507 21. Wu, W. *et al.* A chemical rescue screen identifies a *Plasmodium falciparum*  
508 apicoplast inhibitor targeting MEP isoprenoid precursor biosynthesis.  
509 *Antimicrob. Agents Chemother.* AAC.03342-14 (2014). doi:10.1128/AAC.03342-  
510 14
- 511 22. Gisselberg, J. E., Herrera, Z., Orchard, L., Llinas, M. & Yeh, E. A Specific Non-  
512 Bisphosphonate Inhibitor Of The Bifunctional Farnesyl/Geranylgeranyl  
513 Diphosphate Synthase In Malaria Parasites. *bioRxiv* 134338 (2017).  
514 doi:10.1101/134338
- 515 23. Gordon, J. J., Kelly, B. K. & Miller, G. A. Actinonin: an antibiotic substance  
516 produced by an actinomycete. *Nature* **195**, 701–702 (1962).
- 517 24. Goodman, C. D. & McFadden, G. I. Ycf93 (Orf105), a small apicoplast-encoded  
518 membrane protein in the relict plastid of the malaria parasite *Plasmodium*  
519 *falciparum* that is conserved in Apicomplexa. *PloS One* **9**, e91178 (2014).
- 520 25. Chen, D. Z. *et al.* Actinonin, a naturally occurring antibacterial agent, is a potent  
521 deformylase inhibitor. *Biochemistry (Mosc.)* **39**, 1256–1262 (2000).
- 522 26. Bracchi-Ricard, V. *et al.* Characterization of an eukaryotic peptide deformylase  
523 from *Plasmodium falciparum*. *Arch. Biochem. Biophys.* **396**, 162–170 (2001).

- 524 27. Lee, M. D. *et al.* Human mitochondrial peptide deformylase, a new anticancer  
525 target of actinonin-based antibiotics. *J. Clin. Invest.* **114**, 1107–1116 (2004).
- 526 28. Kumar, A. *et al.* Crystals of peptide deformylase from *Plasmodium falciparum*  
527 reveal critical characteristics of the active site for drug design. *Struct. Lond. Engl.*  
528 *1993* **10**, 357–367 (2002).
- 529 29. Margolis, P. S. *et al.* Peptide Deformylase in *Staphylococcus aureus*: Resistance to  
530 Inhibition Is Mediated by Mutations in the Formyltransferase Gene. *Antimicrob.*  
531 *Agents Chemother.* **44**, 1825–1831 (2000).
- 532 30. Ganesan, S. M., Falla, A., Goldfless, S. J., Nasamu, A. S. & Niles, J. C. Synthetic RNA-  
533 protein modules integrated with native translation mechanisms to control gene  
534 expression in malaria parasites. *Nat. Commun.* **7**, 10727 (2016).
- 535 31. Richter, U. *et al.* A Mitochondrial Ribosomal and RNA Decay Pathway Blocks Cell  
536 Proliferation. *Curr. Biol.* **23**, 535–541 (2013).
- 537 32. van Dooren, G. G. *et al.* A novel dynamin-related protein has been recruited for  
538 apicoplast fission in *Toxoplasma gondii*. *Curr. Biol. CB* **19**, 267–276 (2009).
- 539 33. Jacot, D., Daher, W. & Soldati-Favre, D. *Toxoplasma gondii* myosin F, an essential  
540 motor for centrosomes positioning and apicoplast inheritance. *EMBO J.* **32**,  
541 1702–1716 (2013).
- 542 34. Lévêque, M. F. *et al.* Autophagy-Related Protein ATG8 Has a Noncanonical  
543 Function for Apicoplast Inheritance in *Toxoplasma gondii*. *mBio* **6**, e01446-1415  
544 (2015).

- 545 35. Karnataki, A., Derocher, A. E., Coppens, I., Feagin, J. E. & Parsons, M. A membrane  
546 protease is targeted to the relict plastid of toxoplasma via an internal signal  
547 sequence. *Traffic Cph. Den.* **8**, 1543–1553 (2007).
- 548 36. Ganji, R. J. *et al.* Structural basis for the inhibition of M1 family aminopeptidases  
549 by the natural product actinonin: Crystal structure in complex with E. coli  
550 aminopeptidase N. *Protein Sci. Publ. Protein Soc.* **24**, 823–831 (2015).
- 551 37. Tanveer, A. *et al.* An FtsH protease is recruited to the mitochondrion of  
552 Plasmodium falciparum. *PloS One* **8**, e74408 (2013).
- 553 38. van Dooren, G. G. *et al.* Development of the endoplasmic reticulum,  
554 mitochondrion and apicoplast during the asexual life cycle of Plasmodium  
555 falciparum. *Mol. Microbiol.* **57**, 405–419 (2005).
- 556 39. Stanway, R. R. *et al.* Organelle segregation into Plasmodium liver stage  
557 merozoites. *Cell. Microbiol.* **13**, 1768–1782 (2011).
- 558 40. Sequential processing of the Toxoplasma apicoplast membrane protein FtsH1 in  
559 topologically distinct domains during intracellular trafficking. Available at:  
560 <http://www.ncbi.nlm.nih.gov/pmc/articles/PMC2817949/>. (Accessed: 22nd  
561 June 2016)
- 562 41. Spillman, N. J., Beck, J. R., Ganesan, S. M., Niles, J. C. & Goldberg, D. E. The  
563 chaperonin TRiC forms an oligomeric complex in the malaria parasite cytosol.  
564 *Cell. Microbiol.* **19**, (2017).
- 565 42. Giaever, G. *et al.* Genomic profiling of drug sensitivities via induced  
566 haploinsufficiency. *Nat. Genet.* **21**, 278–283 (1999).

- 567 43. Baetz, K. *et al.* Yeast genome-wide drug-induced haploinsufficiency screen to  
568 determine drug mode of action. *Proc. Natl. Acad. Sci. U. S. A.* **101**, 4525–4530  
569 (2004).
- 570 44. Hersch, G. L., Burton, R. E., Bolon, D. N., Baker, T. A. & Sauer, R. T. Asymmetric  
571 interactions of ATP with the AAA+ ClpX6 unfoldase: allosteric control of a  
572 protein machine. *Cell* **121**, 1017–1027 (2005).
- 573 45. Bieniossek, C. *et al.* The molecular architecture of the metalloprotease FtsH.  
574 *Proc. Natl. Acad. Sci. U. S. A.* **103**, 3066–3071 (2006).
- 575 46. Surolia, N. & Surolia, A. Triclosan offers protection against blood stages of  
576 malaria by inhibiting enoyl-ACP reductase of *Plasmodium falciparum*. *Nat. Med.*  
577 **7**, 167–173 (2001).
- 578 47. He, C. Y. *et al.* A plastid segregation defect in the protozoan parasite *Toxoplasma*  
579 *gondii*. *EMBO J* **20**, 330–339 (2001).
- 580 48. Janska, H., Kwasniak, M. & Szczepanowska, J. Protein quality control in  
581 organelles — AAA/FtsH story. *Biochim. Biophys. Acta BBA - Mol. Cell Res.* **1833**,  
582 381–387 (2013).
- 583 49. MEROPS - the Peptidase Database. Available at: [http://merops.sanger.ac.uk/cgi-](http://merops.sanger.ac.uk/cgi-bin/smi_summary?mid=J16.404)  
584 [bin/smi\\_summary?mid=J16.404](http://merops.sanger.ac.uk/cgi-bin/smi_summary?mid=J16.404). (Accessed: 10th May 2017)
- 585 50. van Dooren, G. G., Su, V., D’Ombrain, M. C. & McFadden, G. I. Processing of an  
586 Apicoplast Leader Sequence in *Plasmodium falciparum* and the Identification of a  
587 Putative Leader Cleavage Enzyme. *J. Biol. Chem.* **277**, 23612–23619 (2002).
- 588 51. Mallari, J. P., Oksman, A., Vaupel, B. & Goldberg, D. E. Kinase-associated  
589 endopeptidase 1 (Kae1) participates in an atypical ribosome-associated complex



- 590 in the apicoplast of *Plasmodium falciparum*. *J. Biol. Chem.* **289**, 30025–30039
- 591 (2014).
- 592 52. Ponpuak, M. *et al.* A role for falcilysin in transit peptide degradation in the
- 593 *Plasmodium falciparum* apicoplast. *Mol. Microbiol.* **63**, 314–334 (2007).
- 594 53. Chen, X. *et al.* Inhibitors of *Plasmodium falciparum* methionine aminopeptidase
- 595 1b possess antimalarial activity. *Proc. Natl. Acad. Sci. U. S. A.* **103**, 14548–14553
- 596 (2006).
- 597 54. Srivastava, A. *et al.* Stage-Specific Changes in *Plasmodium* Metabolism Required
- 598 for Differentiation and Adaptation to Different Host and Vector Environments.
- 599 *PLoS Pathog.* **12**, e1006094 (2016).
- 600 55. Shears, M. J., Botté, C. Y. & McFadden, G. I. Fatty acid metabolism in the
- 601 *Plasmodium* apicoplast: Drugs, doubts and knockouts. *Mol. Biochem. Parasitol.*
- 602 **199**, 34–50 (2015).
- 603 56. Dharia, N. V. *et al.* Use of high-density tiling microarrays to identify mutations
- 604 globally and elucidate mechanisms of drug resistance in *Plasmodium falciparum*.
- 605 *Genome Biol.* **10**, R21 (2009).
- 606 57. Guggisberg, A. M. *et al.* A sugar phosphatase regulates the methylerythritol
- 607 phosphate (MEP) pathway in malaria parasites. *Nat. Commun.* **5**, 4467 (2014).
- 608 58. Sidhu, A. B. S. *et al.* In vitro efficacy, resistance selection, and structural modeling
- 609 studies implicate the malarial parasite apicoplast as the target of azithromycin. *J.*
- 610 *Biol. Chem.* **282**, 2494–2504 (2007).
- 611 59. Vandenbroucke, R. E. & Libert, C. Is there new hope for therapeutic matrix
- 612 metalloproteinase inhibition? *Nat Rev Drug Discov* **13**, 904–927 (2014).

- 613 60. Sangshetti, J. N., Khan, F. A. K. & Shinde, D. B. Peptide deformylase: a new target  
614 in antibacterial, antimalarial and anticancer drug discovery. *Curr. Med. Chem.* **22**,  
615 214–236 (2015).
- 616 61. Skipper, P. L., Tannenbaum, S. R., Thilly, W. G., Furth, E. E. & Bishop, W. W.  
617 Mutagenicity of hydroxamic acids and the probable involvement of  
618 carbamylation. *Cancer Res.* **40**, 4704–4708 (1980).
- 619 62. Gersch, M. *et al.* AAA+ chaperones and acyldepsipeptides activate the ClpP  
620 protease via conformational control. **6**, 6320 (2015).
- 621 63. Sheiner, L. *et al.* A systematic screen to discover and analyze apicoplast proteins  
622 identifies a conserved and essential protein import factor. *PLoS Pathog.* **7**,  
623 e1002392 (2011).
- 624 64. Moore, R. B. *et al.* A photosynthetic alveolate closely related to apicomplexan  
625 parasites. *Nature* **451**, 959–963 (2008).
- 626 65. Spork, S. *et al.* An Unusual ERAD-Like Complex Is Targeted to the Apicoplast of  
627 *Plasmodium falciparum*. *Eukaryot. Cell* **8**, 1134–1145 (2009).
- 628 66. Bittner, L.-M., Arends, J. & Narberhaus, F. When, how and why? Regulated  
629 proteolysis by the essential FtsH protease in *Escherichia coli*. *Biol. Chem.* **398**,  
630 625–635 (2017).
- 631 67. Ogura, T. *et al.* Balanced biosynthesis of major membrane components through  
632 regulated degradation of the committed enzyme of lipid A biosynthesis by the  
633 AAA protease FtsH (HflB) in *Escherichia coli*. *Mol. Microbiol.* **31**, 833–844  
634 (1999).

68. Rudner, D. Z. & Losick, R. A sporulation membrane protein tethers the pro- $\sigma$  K processing enzyme to its inhibitor and dictates its subcellular localization. *Genes Dev.* **16**, 1007–1018 (2002).
69. Shotland, Y. *et al.* Proteolysis of the phage lambda CII regulatory protein by FtsH (HflB) of Escherichia coli. *Mol. Microbiol.* **24**, 1303–1310 (1997).
70. Wang, H. *et al.* Increasing intracellular magnesium levels with the 31-amino acid MgtS protein. *Proc. Natl. Acad. Sci. U. S. A.* **114**, 5689–5694 (2017).

## Methods

### Chemicals

Fosmidomycin was purchased from Santa Cruz Biotechnology and 10mM aliquots were prepared in water. Chloramphenicol was purchased from Sigma Aldrich and 50mM aliquots were prepared in 100% ethanol. Actinonin was purchased from Sigma Aldrich and 25mM aliquots were prepared in 100% ethanol. Anhydrotetracycline was purchased from Sigma and 2.5mM aliquots prepared in 100% ethanol and used at a final concentration of 0.5uM. Actinamide was a gift from Drs. David Scheinberg and Ouathék Ouerfelli and 25mM aliquots were prepared in 100% ethanol.

Enoxacin, ciprofloxacin, levofloxacin, norfloxacin, novobiocin, coumeramycin, mericitabine, 2’deoxy-2-F-cytidine, gemcitabine, ADEP1a, beta-lactone 4, beta-lactone 7, and rifampin were acquired and solubilized as noted in Table 1-Source Data 1.

Isopentenyl pyrophosphate (IPP) was purchased from Isoprenoids LC and stored at 2 mg/mL in 70% methanol, 30% 10mM ammonium hydroxide at -80C. To prevent methanol toxicity, aliquots of IPP were dried in the speed vacuum centrifuge before adding to cultures. All drugs were stored at -20C and resuspended just prior to use.

### *Plasmodium falciparum* culture and transfections

*P. falciparum* D10 (MRA-201), and D10 ACP<sub>L</sub>-GFP (MRA-568) were obtained from MR4. *P. falciparum* NF54<sup>attB</sup> was a gift from David Fidock (Columbia University). NF54<sup>attB</sup> strain constitutively expressing Cas9 and T7 Polymerase, generated previously<sup>71</sup>, was used in this study. Parasites were maintained in human erythrocytes (2% hematocrit) in RPMI 1640 media supplemented with 0.25% Albumax II (GIBCO Life Technologies), 2 g/L sodium bicarbonate, 0.1 mM hypoxanthine, 25 mM HEPES (pH 7.4), 50 µg/L gentamycin, and 0.4% glucose at 37°C, 5% O<sub>2</sub>, and 5% CO<sub>2</sub>. All cell lines tested negative for mycoplasma contamination during routine checks.

Parasites were transfected using methods already published<sup>30</sup>. Briefly, we used 50 ug of plasmid per 200 uL packed red blood cells (RBCs) adjusted to 50% hematocrit. We used

a Bio-Rad Gene Pulser II to preload uninfected RBCs using eight square-wave pulses of 365 V for 1 ms, separated by 100 ms. Preloaded RBCs were resealed for 1 hour at 37°C and washed twice in RPMI to remove lysed cells. Schizont stage parasites at 0.5% parasitemia were then allowed to invade half of the preloaded RBCs during two sequential reinvasions. Media was changed daily for the first 12 days and every other day thereafter. Parasites were split 1:1 into fresh blood every 4 days until parasites were visible by Giemsa smear. To select for integration of the pFtsH1 into *P. falciparum* NF54<sup>attB-pFICRISPR</sup> parasites, transfected parasites were maintained in media containing 5 nM WR99210 and 0.5 uM anhydrotetracycline (Sigma) and then selected with 2.5 mg/l Blasticidin S (Sigma) beginning 4 days after transfection. Transfected parasites were authenticated using PCR to check for integration (Table 3-Source Data 1), followed by sequencing of the modified locus, and western blot to visualize tagged proteins at the expected size (Figure 3-Figure Supplement 1).

### ***Toxoplasma gondii* culture and transfection**

*T. gondii* RH and *T. gondii* RH  $\Delta ku80\Delta hxprr$  strains were a gift from Matthew Bogoy (Stanford University) and maintained by passage through confluent monolayers of human foreskin fibroblasts (HFFs) host cells. HFFs were cultured in DMEM (Invitrogen) supplemented with 10% FBS (Fetal Plex Animal Serum from Gemini), 2mM L-glutamine (Gemini), and 100 ug penicillin and 100 ug streptomycin per mL (Gibco Life Technologies), maintained at 37 C and 5% CO<sub>2</sub>. Parasites were harvested for assays by syringe lysis of infected HFF monolayers.

For transfection of *T. gondii*  $\Delta ku80\Delta hxprr$ , 15ug of the pTgCRISPR plasmid<sup>73</sup> was combined with 3 ug of the pFtsH1N805S or pFtsH1WT that had been linearized by NotI digestion. Approximately 10<sup>7</sup> parasites were released from host cells using syringe lysis and washed into 400uL of cytomix containing both plasmids. Parasites were electroporated (BTX Electro Cell Manipulator 600) with 1.2-1.4 kV, 2.5kV/resistance, R2 (24 ohm) and then allowed to recover in the cuvette at room temperature for 10 mins before adding to host cells. After 24 hours, media containing 25ug/mL mycophenolic acid (Sigma) and 50 ug/mL xanthine (Sigma) was added to select for transfectants. After a week, plaques were observed and single clones were isolated using limiting dilution. Transfected parasites were authenticated using PCR to check for integration (Table 3-Source Data 1), followed by sequencing of the modified locus.

### ***Toxoplasma gondii* genome sequencing and SNP identification**

Actinonin resistant and susceptible *T. gondii* were grown on 15 cm dishes containing confluent HFF monolayers until spontaneous lysis of the monolayer was achieved. Released parasites were collected and filtered through 5 micrometer syringe filters (Millipore) before isolating DNA (Qiagen DNAeasy Blood & Tissue).

*T. gondii* genomic DNA isolated from either the parental *T. gondii* RH strain (SRR3666219) or any of its derived mutants (SRR3666219, SRR3666222, SRR3666224, SRR3666792, SRR3666794, SRR3666796, SRR3666798, SRR3666799, SRR3666801) was sequenced in an Illumina NextSeq apparatus using 2x150bp reads at an average sequencing depth of 35x. Sequencing reads were quality trimmed and remnants of



sequencing adaptors removed with *trimmomatic* (PMID:24695404). Next, reads were mapped to the reference nuclear assembly of the *T. gondii* GT1 strain (ToxoDB v13.0) and the apicoplast genome assembly from the RH strain (NC\_001799) with the program *bowtie2* (PMID:25621011). Duplicated aligned reads were removed with *picard tools* (<http://broadinstitute.github.io/picard>) and reads spanning InDels were realigned with GATK (PMID:20644199). Afterwards, allelic variants were called with *samtools mpileup* (PMID:19505943) followed by *bcftools call* with *-p* set to 0.05 (PMID:26826718). Finally, classification of mutations was performed with *snpEff* (PMID:22728672).

## Growth inhibition assays

For *P. falciparum* EC<sub>50</sub> calculations, growth assays were performed in 96 well plates containing serial dilution of drugs in triplicate. Media was supplemented with 200 uM IPP as indicated. Growth was initiated with ring-stage parasites (synchronized with 5% sorbitol treatment) at 1% parasitemia and 1% hematocrit. To calculate growth, cultures were incubated for 72h and growth was then terminated by incubation with 1% formaldehyde (Electron Microscopy Services) for 30 minutes at room temperature. Parasitized cells were stained with 50 nM YOYO-1 (Invitrogen) overnight at room temperature and the parasitemia was determined by flow cytometry (BD Accuri C6 Sampler). Data were analyzed by BD Accuri C6 Sampler software. *P. falciparum* growth assays measuring the actinonin EC<sub>50</sub> were repeated in the laboratory > 10 times for WT parasites and >3 times upon knockdown of FtsH1.

For *T. gondii* EC<sub>50</sub> calculations, plaque assays were performed in 24 well plates containing confluent HFF monolayers serial dilutions of drugs in duplicate. Approximately 50 parasites were counted using flow cytometry and added to each well. After incubating for 6 days, infected monolayers were washed, fixed with methanol for 10 minutes, stained with 2% crystal violet (Sigma) for 30 minutes, and then washed again. Plaques were visualized as non-stained areas. The area of each plaque in a given well was measured and summed using ImageJ as a proxy for growth and normalized to the vehicle only control. *T. gondii* plaque assays measuring the actinonin EC<sub>50</sub> were repeated in the laboratory > 2 times for resistant parasites that arose from actinonin selection, > 10 times for WT parasites, and > 3 times for TgFtsH(N805S).

For measuring the growth inhibition of *P. falciparum* during the time course, 10 uM actinonin, 10 uM fosmidomycin, 30 uM chloramphenicol, 200 uM IPP, and 0.5 uM of anhydrotetracycline was used as necessary. For comparison of growth between different treatment conditions, cultures were carried simultaneously and handled identically with respect to media changes and addition of blood cells. Daily samples were collected and fixed with 1% formaldehyde for 30 minutes at RT. At the end of the time course, all samples were stained with 50 nM YOYO-1 and parasitemia was measured using flow cytometry. All growth curves were plotted using GraphPad Prism. *P. falciparum* time course experiments were repeated in the laboratory > 2 times for WT parasites and > 2 times upon knockdown of FtsH1.

For measuring the growth inhibition of *T. gondii* during the time course, 6-well plates were set up with no drug, 40 uM actinonin, 25 nM clindamycin, and 4 uM

pyrimethamine. *T. gondii* was added at a MOI = 3. Every 12 hours, parasites were released from HFFs using syringe lysis and counted using flow cytometry (BD Accuri C6 Sampler). After 36 hours, spontaneous lysis of the monolayer was observed and parasites were counted using flow cytometry and then added back to fresh monolayers at MOI = 3 in the absence of drug and parasites were counted every 12 hours as before. *T. gondii* time course experiments were repeated in the laboratory > 2 times.

For measuring growth inhibition using tandem-tomato expression as a proxy for growth, tandem-tomato *T. gondii* were seeded onto a black, clear bottom 96 well plate (Costar 3603) at 2000 parasites per well. Parasites were treated at a range of drug concentrations and fluorescence was measured daily in a plate reader (BioTek, Synergy) for 5 days using the bottom read function.

For co-treatments of *P. falciparum* with actinonin and chloramphenicol, 96 well plates containing ring stage parasites at 1% parasitemia and 1% hematocrit were treated with serial dilutions of both actinonin and chloramphenicol alone and in combination. To determine the effect on growth after one lytic cycle, parasites were fixed at 72h and parasitemia was measured by flow cytometry as above. To determine the effect on growth after two lytic cycles, 75% of the media was exchanged at 72 hours and plates were incubated for an additional 48 hours following fixation and flow cytometry as above. Media was supplemented with 200 uM IPP as a separate control to insure specificity of the drug at the concentrations used. Co-treatments with actinonin and chloramphenicol were performed a single time in the laboratory using three technical replicates.

### Quantitative Real-Time PCR

Parasites from 1 mL of *P. falciparum* culture at ring stage were isolated by saponin lysis followed by two washes with PBS. Since the apicoplast genome is replicate during late stages of intraerythrocytic growth, ring stage parasites were used for gDNA isolation each time to insure that a ploidy change did not confound the qPCR results. DNA was purified using DNAeasy Blood & Tissue (Qiagen). Primers were designed to target genes found on the apicoplast or nuclear genome: *tufA* (apicoplast) 5'-GATATTGATTTCAGCTCCAGAAGAAA-3' and *CHT1* (nuclear) 5'-TGTTTCCTTCAACCCCTTTT-3' / 5'-TGTTTCCTTCAACCCCTTTT-3'. Reactions contained template DNA, 0.15 uM of each primer, and 1x SYBR Green I Master mix (Roche). qPCR reactions were performed at 56C primer annealing and 65C template extension for 35 cycles on a Applied Biosystem 7900HT system. Relative quantification of target genes was determined<sup>72</sup>. For each time point, the apicoplast:nuclear genome ratio was calculated relative to the appropriate control collected at the same time. The apicoplast:nuclear genome ratio was measured by qPCR > 5 times for WT parasites treated with actinonin and > 2 times upon knockdown of FtsH1.

### Fluorescence Microscopy

*P. falciparum* D10 ACP(L)-GFP parasites diluted to 0.05% hematocrit were settled on a Lab-Tek II Chambered Coverglass (Thermo Fisher) and incubated in 2 ug/mL Hoescht 33342 stain for 15 minutes at 37C. Widefield epifluorescence live cell images were

acquired with an Olympus IX70 microscope. The microscope was outfitted with a Deltavision Core system (Applied Precision) using an Olympus x60 1.4NA Plan Apo Lens, a Sedat Quad filter set (Semrock) and a CoolSnap HQ CCD Camera (Photometrics). The microscope was controlled and images were deconvolved via softWoRx 4.1.0 software. ImageJ software was used to analyze resulting images.

Live microscopy of *T. gondii* RH FNR-RFP parasites<sup>76</sup> was performing using Lab-Tek II Chambered Coverglasses containing confluent HFF monolayers. Parasites were added at an MOI = 1. After 36 hours of incubation, parasites were incubated with 2 ug/mL of Hoechst for 15 minutes. Widefield epifluorescence live cell images were acquired with a Nikon Eclipse Ti inverted fluorescence microscope with a NA 1.40 oil-immersion objective (Nikon Instruments) and controlled using MicroManager v1.4. An iXon3 888 EMCCD camera (Andor) was used for fluorescence imaging and an a Zyla 5.5 sCMOS camera (Andor) was used for phase contrast imaging. ImageJ software was used to analyze the resulting images. ACP-GFP parasites treated with actinonin were imaged > 4 different times in the laboratory.

### Immunoblot

Parasites from 9 mL of *P. falciparum* culture were isolated by saponin lysis, washed with PBS and resuspended in 1 x NuPAGE LDS sample buffer (Invitrogen). Proteins were separated by electrophoresis on 4-12% Bis-Tris gel (Invitrogen) and transferred to a nitrocellulose membrane. After blocking, membranes were probed with 1:2000 monoclonal mouse anti-FLAG M2 (Sigma) and 1:10,000 IRDye 680RD goat anti-mouse IgG (LiCor Bioscience) for anti-FtsH1 immunoblots. For anti-PDF immunoblots, membranes were probed with 1:2000 rabbit monoclonal anti-MYC (Cell Signaling Technology 2278S), followed by 1:20,000 rabbit polyclonal anti-PfAldolase (Abcam ab207494) and 1:10,000 donkey anti-rabbit 800 (LiCor Biosciences). Fluorescence antibody-bound proteins were detected with Odyssey Imager (LiCor Biosciences). When antibodies of the same species were used, membranes were probed and imaged sequentially. Immunoblots of FtsH-FLAG and PFD-myc were repeated in the laboratory > 2 times.

### *Toxoplasma gondii* resistance selection

Approximately  $2 \times 10^6$  *T. gondii* RH parasites were added to T25s containing a confluent HFF monolayer and allowed to grow for 24 hours. To mutagenize, between 500 uM – 2 mM N-ethyl N-nitrosourea (ENU) diluted in DMSO was added to flasks and incubated for 2 hours at 37 C. Cultures were then washed twice with 10mLs of cold PBS and then released from host cells using syringe lysis. A quarter of the resulting parasites were passaged to T25s containing a fresh monolayer of HFFs. After two passages, parasites were treated with 40uM actinonin (the minimum inhibitory concentration of sensitive *T. gondii*). After one passage under actinonin selection, a severe bottleneck was observed. Plaques of resistant parasites could be observed after one week of constant actinonin pressure with periodic media changes. Finally, single clones were isolated using limiting dilution. Actinonin resistance selection was repeated in the laboratory twice.

## ***Plasmodium falciparum* construct generation**

The primers used for generating different fragments are listed in the Table 3-Source Data 1. A construct for inducing PfPDF (PF3D7\_0907900) expression in *P. falciparum* was generated from the parental pMG96 plasmid. PDF gene was amplified from pUC57-Amp plasmid with the codon optimized PDF gene (PF3D7\_0907900) using primers SMG374 and SMG375. The amplicon was cloned in PfCAM base plasmid (pMG96), which contains single aptamer at 5'UTR and 10x aptamer at 3'UTR. The restriction sites MScI and BstEII were used for cloning thus encoding PDF containing c-myc tag at the c-terminal end. The transfection was carried out as discussed previously<sup>77</sup>. A construct for regulating expression of FtsH1 (PF3D7\_1239700) in *P. falciparum* (pFtsH1) was generated from the parental pSN054, a modified pJazz linear plasmid (Table 3-Source Data 1). The left homology region was amplified from parasite genomic DNA using primers SMG476 and SMG 477 and was cloned using FseI and AsiI restriction sites. FtsH1 protein coding nucleotides 2348- 2643 were recoded using gene block (IDT) to remove the PAM site. The right homology region was amplified from parasite genomic DNA using primers SMG501 and SMG502. These fragments were cloned using the I-SceI restriction site. Targeting guide RNA was generated by klenow reaction using primers SMG514 and SMG515 and was inserted using the AflII site. All sequences were ligated into the parent plasmid using Gibson assembly. Constructs for regulating PF3D7\_1464900 were generated similarly (SMG505 and SMG506 for the right homology region; SMG495 and SMG496 for the left homology region; SMG518 and SMG519 for the gRNA klenow reaction). While this construct could be generated, no parasites emerged after two transfections. Constructs for regulating PF3D7\_1119600 using primers SMG503 and SMG504 for the right homology region and SMG481 and SMG507 for the left homology region were unable to be generated because of unsuccessful PCR.

## ***Toxoplasma gondii* construct generation**

A construct for knocking in the FtsH1<sub>N805S</sub> allele into the endogenous loci of FtsH1 (pFtsHN805S) was generated from the parental pTKO2 vector. Briefly, a ~800 bp sequence upstream of the TGGT1\_259260 start codon was amplified as the left homology region (using primers KAJ1 and KAJ2). The FtsH<sub>N805S</sub> sequence was then amplified from actinonin resistant cDNA (using primers KAJ3 and KAJ4). The HXGPRT resistance cassette was amplified off of the pTKO2 cassette (using primers KAJ5 and KAJ6). A ~800 bp sequence downstream of the TGGT1\_259260 stop codon was amplified as the right homology region (using primers KAJ7 and KAJ8). To insert the right homology region, the pTKO2 plasmid was cut with HindIII and HpaI and the 800 bp sequence was inserted using infusion (Clontech). To insert the left homology region and the FtsH1<sub>N805S</sub> allele, the pTKO2 plasmid containing the downstream homology region was cut with NotI and EcoRI and the two PCR products were inserted also using infusion (Clontech). The resulting colonies were tested using a diagnostic HpaI digest and correct clones were subjected to Sanger sequencing of the inserts. To revert the pFtsHN805S construct to pFtsHWT, we used Q5 mutagenesis (NEB) and primers KAJ9 and KAJ10.



To increase the transfection efficiency and specificity, CRISPR-Cas9 was used to insert a double stranded break at the site of insertion (the endogenous TGGT1\_259260 allele). Briefly, pSAG1::Cas9-U6::sgUPRT<sup>73</sup> was modified to contain a guide sequence specific to a FtsH1 intron using the Q5 mutagenesis kit (NEB) and primers KAJ11 and KAJ12. Sanger sequencing of the guide was used to verify the resulting plasmid.

### **Recombinant *PfFtsH1* expression and purification**

His<sub>6</sub>-SUMO-*PfFtsH1*<sub>91-612</sub>-GST was cloned into a pET22-based vector by Gibson assembly<sup>79</sup>. Point mutations in this gene were constructed by site-directed mutagenesis. Liquid cultures of T7 Express cells (NEB) harboring these plasmids were grown to log phase, cooled to 20 °C, and induced with 0.5 mM IPTG plus 0.1% benzyl alcohol (Sigma). Cultures were incubated for an additional 3 h at 20 °C before harvesting and freezing. Cell pellets were resuspended in lysis buffer (50 mM HEPES, pH 7.5, 200 mM NaCl, 10% glycerol, 2 mM β-mercaptoethanol [βME], 20 mM imidazole), mixed with lysozyme (1 mg/mL) and Benzonase (Sigma), and lysed by sonication. Cleared lysates were incubated with Ni-NTA resin (G-Biosciences) for 1 h at 4 °C. After extensive washing with lysis buffer, bound proteins were eluted from the resin with lysis buffer plus 300 mM imidazole. The eluent was applied to a GSTrap column (GE Healthcare) and washed with storage buffer (50 mM HEPES, pH 7.5, 200 mM NaCl, 10% glycerol, 2 mM βME) before eluting with storage buffer plus 10 mM reduced glutathione. The eluent was dialyzed overnight against storage buffer, concentrated, snap-frozen, and stored in aliquots at -80 °C.

### ***PfFtsH1* enzymatic assays**

Rates of ATP hydrolysis by FtsH were measured using a coupled spectrophotometric assay<sup>80</sup> in PD buffer (25 mM HEPES, pH 7.5, 200 mM NaCl, 5 mM MgSO<sub>4</sub>, 10 μM ZnSO<sub>4</sub>, 10% glycerol) with 3% dimethyl sulfoxide (DMSO) at 37 °C. Protein degradation rates were measured by incubating FtsH (1 μM) with FITC-labeled casein (4 μM, Sigma, Type III) in PD buffer plus 3% DMSO. Reactions were started by adding ATP (4 mM) with a regeneration system (16 mM creatine phosphate and 75 μg/mL creatine kinase), and degradation was followed by measuring the fluorescence intensity (excitation 485 nm; emission 528 nm) at 37 °C. For activity-inhibition assays, reactions were pre-incubated with inhibitor in DMSO for 10 min before adding ATP. Addition of inhibitor provided the 3% DMSO found in the other assays. For determining specific activities, the total concentration of casein was 10 μM (2 μM of FITC-labeled casein plus 8 μM unlabeled casein).

### **Statistical analysis**

When applicable, data was analyzed using Graph Pad Prism software and expressed as mean values +/- standard error of the mean (SEM). Basic experiments were repeated at least twice including both positive and negative controls. Biological replicates were performed on different days or on independent cultures while technical replicates were performed using cells from the same culture. Experiments were not blinded. All new reagents were validated prior to use. All generated strains were checked for integration using PCR, sequencing of the modified locus, western blot, and microscopy when applicable. All qPCR primers were assessed for single amplicon.

## Data Availability

Our research resources, including methods, cells, reagents and protocols, are available upon request. Source data for the whole genome sequencing analysis is provided in Table 2- Source Data 1.

71. Sidik, S. M. *et al.* A Genome-wide CRISPR Screen in *Toxoplasma* Identifies Essential Apicomplexan Genes. *Cell* **166**, 1423–1435.e12 (2016).
72. Pfaffl, M. W. A new mathematical model for relative quantification in real-time RT-PCR. *Nucleic Acids Res.* **29**, e45 (2001).
73. Shen, B., Brown, K. M., Lee, T. D. & Sibley, L. D. Efficient gene disruption in diverse strains of *Toxoplasma gondii* using CRISPR/CAS9. *mBio* **5**, e01114-01114 (2014).
74. Camps, M. *et al.* A rRNA mutation identifies the apicoplast as the target for clindamycin in *Toxoplasma gondii*. *Mol Microbiol.* **5**, 1309-18 (2002).
75. Dahl, E.L., Rosenthal, P.J. Multiple antibiotics exert delayed effects against the *Plasmodium falciparum* apicoplast. *Antimicrob Agents Chemother.* **51**, 3485-90 (2007).
76. Striepen, B. *et al.* The plastid of *Toxoplasma gondii* is divided by association with the centrosomes. *J Cell Biol.* **151**, 1423-1424 (2000).
77. Nkrumah L.J. *et al.* Efficient site-specific integration in *Plasmodium falciparum* chromosomes mediated by mycobacteriophage Bxb1 integrase. *Nature Methods.* **8**, 615-21 (2006).
78. Gubbels M.J. *et al.* High-throughput growth assay for *Toxoplasma gondii* using yellow fluorescent protein. *Antimicrob Agents Chemother.* **47**, 309-16. (2003).
79. Gibson D.G. *et al.* Enzymatic assembly of DNA molecules up to several hundred kilobases. *Nature Methods.* **6**(5), 343-5. (2009).
80. Norby, J.G. Coupled assay of Na<sup>+</sup>, K<sup>+</sup>-ATPase activity. *Methods Enzymol.* **156**, 116-9. (1988).

## Acknowledgements

We thank Katrina Hong for assistance in drug assays, Dr. Boris Striepen for providing the *T. gondii* FNR-RFP as well as tandem tomato strains, Drs. David Scheinberg and Ouathék Ouerfelli for providing actinamide, and Dr. Saman Habib for providing PfFtsH1 antibody. This project has been funded with federal funds from the NIAID, NIGMS, and Director's Fund, National Institutes of Health, Department of Health and Human Services under Award Numbers 1K08AI097239 (EY), 1DP5OD012119 (EY), U19AI110819

(HAL), 1DP2OD007124 (JCN), P50 GM098792 (JCN), AI016892 (RTS),  
F32GM116241 (SBH), and T32GM007276 (KAJ). Funding was also provided by the  
Burroughs-Wellcome Fund (EY), Bill and Melinda Gates Foundation (OPP1069759;  
JCN), and the Stanford Bio-X SIGF William and Lynda Steere Fellowship (KAJ).

# **Author Information**

## **Affiliations**

Department of Biochemistry, Stanford Medical School, Stanford, California 94305  
Katherine Amberg-Johnson, Ellen Yeh

Department of Pathology, Stanford Medical School, Stanford, California 94305  
Ellen Yeh

Department of Microbiology & Immunology, Stanford Medical School, Stanford,  
California, 94305  
Katherine Amberg-Johnson, Ellen Yeh

Department of Biology, Massachusetts Institute of Technology, Cambridge,  
Massachusetts, 02139  
Sanjay B. Hari, Robert T. Sauer

Department of Biological Engineering, Massachusetts Institute of Technology,  
Cambridge, Massachusetts, 02139  
Suresh M. Ganesan, Jacquin C. Niles

Department of Infectious Disease, The J. Craig Venter Institute, Rockville, Maryland,  
20850  
Hernan A. Lorenzi

## **Competing financial interests**

The authors declare no competing financial interests.

## **Corresponding author**

Correspondence to: Ellen Yeh

# **Figure 1: Actinonin inhibits apicoplast biogenesis in *P. falciparum***

(a) Structure of actinonin  
(b) Time course of parasite growth during actinonin treatment with or without IPP, normalized to control cultures with or without IPP as appropriate. Error bars represent the SEM of two biological replicates.  
(c) Time course of the apicoplast:nuclear genome ratio measured by quantitative PCR (qPCR) using primers for the apicoplast and nuclear genomes during treatment with actinonin and IPP. Genome ratios were normalized to control parasites grown with IPP only. Error bars as in b.  
(d) Representative images of the apicoplast of IPP-rescued control and actinonin treated parasites 24 hours after treatment during the schizont stage. The apicoplast is visualized using the *P. falciparum* reporter strain D10 ACP-GFP in which GFP is targeted to the apicoplast and the nucleus is stained with Hoescht 33342. During *Plasmodium* replication, the apicoplast starts as a single small spherical organelle (ring stage) which branches and divides into multiple apicoplasts (schizont stage). A punctate apicoplast that does not branch indicates a defect in apicoplast biogenesis.

# **Figure 2: A mutation in the protease domain of *ftsH1* is sufficient to confer resistance to actinonin in *T. gondii***

(a) Representative images of the apicoplast of control and actinonin treated parasites 36 hours after infection. The apicoplast is visualized using the *T. gondii* reporter strain RH FNR-RFP in which RFP is targeted to the apicoplast and the nucleus is stained with Hoescht 33342. Each parasite contains one apicoplast, except during cell division when there may be two. White arrows point at examples of *T. gondii* parasites missing an apicoplast.  
(b) Dose-dependent parasite growth inhibition upon treatment with actinonin for the actinonin-sensitive parent strain (RH) compared with 3 independent clones following selection for actinonin resistance (resistant 1, resistant 2, resistant 3). These three resistant clones are representative of the eight clones submitted for whole genome sequencing. Growth was measured via summed areas of the plaques formed during plaque assays and normalized to untreated controls. Error bars represent the SEM of two biological replicates.  
(c) Dose-dependent parasite growth inhibition upon treatment with actinonin for *ftsH1*WT compared with *ftsH1*(N805S) parasites in RH  $\Delta$ ku80 strain. Data was measured and analyzed as in 2b.  
(d) Schematic of TgFtsH1. This protein contains a N-unique region containing a putative transmembrane domain, an AAA ATPase domain used for unfolding proteins, a peptidase domain with a zinc co-factor in the catalytic site, and a C-unique region. The resistance-conferring variant FtsH(N805S) is found in the peptidase domain near the catalytic site.

**Figure 3: Knockdown of *ftsH1* in *P. falciparum* leads to apicoplast loss and hypersensitivity to actinonin**

(a) Schematic of the endogenous knockdown strategy. When aTC is present in the media, the tet-repressor binds aTC and does not bind the 10x-aptamer sequence, which relieves translational repression, allowing PfFtsH1 to be expressed. When aTC is washed out of the media, the tet-repressor binds the 10x-aptamer and prevents expression of PfFtsH1. (b) Time course of parasite growth without aTC and in the presence or absence of IPP in the media, normalized to the untreated or IPP-rescued parental strain as appropriate. Error bars represent the SEM of two biological replicates. (c) Time course of the apicoplast:nuclear genome ratio measured by quantitative PCR (qPCR) using primers for the apicoplast and nuclear genomes during treatment with or without aTC. All samples contained IPP to rescue parasite growth. Genome ratios were normalized to respective parental cultures also grown with IPP. Error bars as in c. (d) Dose-dependent parasite growth inhibition by actinonin in the absence or presence of aTC. Error bars as in c.

**Figure 4: Actinonin inhibits PfFtsH1 *in vitro*.**

(a) Schematic of PfFtsH1 constructs used for biochemical assays. Amino acids 91-612 of the endogenous protein (PfFtsH1 endogenous), which include the AAA+ ATPase and peptidase domains, were placed between His<sub>6</sub>-SUMO and GST domains to aid in purification and solubility. WT is the parent construct, E249Q is an inactivating mutation in the AAA+ ATPase domain, and D493A is an inactivating mutation in the peptidase domain. (b) ATP hydrolysis by PfFtsH1 WT and E249Q measured using a coupled spectrophotometric assay<sup>80</sup>. (c) ATP-dependent proteolysis of FITC-labeled casein by PfFtsH1 WT and D493A. (d) Dose-dependent parasite growth inhibition by actinonin (black) or actinamide (red) with and without knockdown of PfFtsH1. Error bars represent the SEM of two biological replicates. (e) Dose-dependent proteolytic inhibition of FITC-labeled casein by PfFtsH1 WT. Error bars represent the SEM of 3 replicates.

**Figure 1-Figure Supplement 1: Actinonin specifically inhibits the apicoplast of *P. falciparum* leading to parasite death after a single replication cycle**

(a) Dose-dependent parasite growth inhibition by actinonin in the absence or presence of IPP. Error bars represent the standard error of the mean (SEM) of two biological replicates. (b) Time course of parasite growth during treatment with actinonin, chloramphenicol, or fosmidomycin in the absence or presence of IPP. Growth is normalized to untreated or IPP-rescued controls as appropriate. Error bars as in a. In contrast to other antimalarials, which cause growth inhibition in a single replication cycle, “delayed death” in *P. falciparum* is associated with inhibitors of apicoplast gene expression and has previously been described in detail<sup>75</sup>. It is characterized by a normal apicoplast and cell division during drug treatment for one replication cycle, followed by halted apicoplast and cell division in daughter parasites of drug-treated parasites.



## **Figure 1-Figure Supplement 2: Actinonin has a distinct inhibition phenotype compared to inhibitors of apicoplast metabolism and translation**

**(a)** Time course of the apicoplast:nuclear genome ratio measured by quantitative PCR (qPCR) for targets in the apicoplast and nuclear genome during treatment with actinonin (black), chloramphenicol (blue), or fosmidomycin (green). While actinonin treatment blocks apicoplast genome replication in a single replication cycle, this effect is not observed until the second replication cycle of chloramphenicol treatment and not at all during fosmidomycin treatment. This is consistent with actinonin blocking apicoplast biogenesis, chloramphenicol blocking apicoplast translation leading to a delayed apicoplast biogenesis defect, and fosmidomycin blocking apicoplast metabolic function but not biogenesis. All samples were grown in IPP and genome ratios were normalized to the untreated control cultures also containing IPP. Error bars represent the SEM of at least 2 biological replicates.

**(b-e)** Representative images of the apicoplast during schizont stage of three successive replication cycles in untreated **(b)**, chloramphenicol **(c)**, fosmidomycin **(d)** and actinonin **(e)** treated cultures all grown with IPP. The apicoplast is visualized using the *P. falciparum* reporter strain D10 ACP-GFP in which GFP is targeted to the apicoplast and the nucleus is stained with Hoescht 33342. In this case, a branched apicoplast indicates successful apicoplast development while punctate apicoplasts (observed in replication cycle 1 for actinonin treatment (e) and replication cycle 2 for chloramphenicol treatment (c)) represents an apicoplast that has failed to develop. The apicoplast is no longer present after replication cycle 2 of actinonin treatment and upon replication cycle 3 of chloramphenicol treatment, which leads to complete mislocalization of the GFP.

## **Figure 1-Figure Supplement 3: Actinonin is unlikely to inhibit the peptide deformylase of *P. falciparum***

**(A)** Western blot of the parental line (NF54attB-pCRISPR) and the PDF-myc parasites grown with or without aTC for 24 hours. Induction of the second copy of PfPDF (PDF-myc) with 4uM aTC results in two bands, the top lighter band representing unprocessed PDF-myc, and the bottom darker band representing processed PDF-myc. PfAldolase is used as a loading control. Induction with 0.125-4uM aTC results in similar amount of PDF-myc induction (data not shown).

**(B)** Western blot for PDF-myc of parasites with or without their apicoplast. An accumulation of unprocessed PDF-myc is observed when the apicoplast is missing, due to loss of the transit peptide cleavage that usually occurs upon import to the apicoplast. This has been shown previously for apicoplast-resident proteins and is consistent with apicoplast localization<sup>8</sup>.

**(C)** Dose dependent parasites growth inhibition by actinonin in the presence of 4uM aTC does not change the actinonin EC<sub>50</sub>. This experiment was also performed under IPP rescue conditions, to confirm apicoplast specificity of actinonin and with a range of aTC concentrations (0.125-4uM) to insure max expression of PDF-myc (data not shown). Error bars represent the SEM of 3 biological replicates.

**(D)** Parasite growth after one or two replication cycles after treatment with actinonin, chloramphenicol, or both actinonin and chloramphenicol normalized to growth of an untreated control. Treatment with actinonin alone inhibited growth after the first



replication cycle, whereas treatment with chloramphenicol alone inhibited growth after the second replication cycle. Co-treatment with chloramphenicol, which targets apicoplast translation, did not suppress effects of actinonin treatment, which was inconsistent with actinonin targeting the peptide deformylase (PDF) of the apicoplast. This experiment was tried using a range of concentrations of actinonin and chloramphenicol to insure the data was not the result of partial inhibition. All concentrations that lead to apicoplast-specific death gave this phenotype (data not shown).

### **Figure 2-Figure Supplement 1: Actinonin treatment causes “delayed death” in *T. gondii* associated with apicoplast loss**

(A) Time course of parasite growth of untreated (blue), clindamycin (green), pyrimethamine (black), or actinonin (red) treated parasites over the course of two lytic cycles. Unlike *P. falciparum*, *T. gondii* undergoes multiple replication cycles in the host cell before lysis, thus each *T. gondii* lytic cycle represents multiple parasite replication cycles. Pyrimethamine inhibits parasite dihydrofolate reductase and was used as a control for a non-apicoplast targeting drug that inhibits growth in a single lytic cycle. As previously reported<sup>74</sup>, clindamycin, an apicoplast translation inhibitor, gave a “delayed death” phenotype in *T. gondii* characterized by completed cell divisions and host re-invasion during drug treatment in the first lytic cycle, followed by halted cell division in the second lytic cycle. Actinonin also led to growth inhibition in the second lytic cycle, suggesting that it also targets the apicoplast. Error bars represent the SEM of two biological replicates. It is important to distinguish between apicoplast-associated “delayed death” in *P. falciparum* and that in *T. gondii*. In *T. gondii*, apicoplast loss occurs in the first lytic cycle and is temporally separate from defects in parasite cell division and growth inhibition observed in the second lytic cycle; whereas in *P. falciparum* defects in apicoplast biogenesis, parasite cell division, and growth inhibition all occur in the second replication cycle. “Delayed death” in *T. gondii* therefore appears more broadly associated with disruption of apicoplast biogenesis, where “delayed death” in *P. falciparum* appears more specific to disruption of apicoplast gene expression that leads to delayed biogenesis defects.

(B) To determine dose-dependent drug target specificity, we used a previously described fluorescent growth assay to quantify the kinetics of death in *T. gondii*<sup>78</sup>. Briefly, *T. gondii* expressing tandem-tomato are treated with drug and fluorescence is quantified daily as a proxy of parasite replication. While 40uM actinonin leads to delayed-death kinetics similar to clindamycin, 80uM actinonin results in immediate death kinetics similar to pyrimethamine, indicating that at this concentration, actinonin hits a second, non-apicoplast target.

### **Figure 3-Figure Supplement 1: C-terminal cleavage of PfFtsH1 is dependent on the presence of the apicoplast and efficiency of PfFtsH1 knockdown can be assessed in parasites missing their apicoplast.**

(A) Western blot of PfFtsH-FLAG levels in parasites with and without an apicoplast and with and without aTC induction. Consistent with the previous report of PfFtsH1 C-terminal processing, we were unable to detect full-length PfFtsH1-FLAG using anti-FLAG in parasites with intact apicoplasts (lane 1)<sup>37,40</sup>. However, in parasites missing

apicoplasts, full-length *PfFtsH1*-FLAG was detectable, suggesting that *PfFtsH1* processing requires the apicoplast (lanes 2). *PfFtsH1*-FLAG is not observed in parasites with or without apicoplasts if there is no aTC induction, indicating that the band representing FtsH-FLAG is specific and not an artifact of missing apicoplasts (lanes 3-4 respectively). All samples contain IPP to rescue growth and Cas9-FLAG is used as a loading control. Each sample was taken at the trophozoite stage.

(B) To assess the knockdown efficiency of *PfFtsH1*, we used a western blot comparing *PfFtsH1*-FLAG levels in the presence (lanes 1-4) or absence of aTC (lanes 5-8) in IPP-rescued parasites missing their apicoplast. Each sample was taken at the trophozoite stage and cycle 0 indicates 24 hours after the removal of aTC. Lanes 9 and 10 are samples from the parental strain that do not contain the FLAG-tag or the aptamer sequence in the 3' UTR of *PfFtsH1*. In each case, Cas9-FLAG was used as a loading control. *PfFtsH1*-FLAG levels were reduced to undetectable levels at 24 hours after aTC removal, validating our knockdown strategy.

### **Figure 3-Figure Supplement 2: Knockdown of *PfFtsH1* specifically disrupts the apicoplast and leads to specific hypersensitivity to actinonin**

(a) Time course of parasite growth with or without aTC and with or without IPP in the media. IPP rescues the growth defect observed in upon *PfFtsH1* downregulation, indicating that *PfFtsH1* is essential for an apicoplast-specific function. Growth is shown normalized to the untreated or IPP-rescued parental strain as appropriate. Error bars represent the SEM of two biological replicates.

(b) Dose-dependent parasite growth inhibition by actinonin with or without aTC for the parental (red) and *PfFtsH* (black) strain. The EC<sub>50</sub> of the parental strain is unchanged by the removal of aTC. Error bars as in a.

(c) Dose-dependent parasite growth inhibition by fosmidomycin with or without aTC and with or without IPP. The fosmidomycin EC<sub>50</sub> is unchanged by regulating levels of *PfFtsH1*, indicating that the observed hypersensitivity to actinonin upon knockdown of *PfFtsH1* is specific to actinonin and does not occur for all apicoplast drug. Error bars represent the SEM of three technical replicates.

(d) Dose-dependent parasites growth inhibition by chloramphenicol during the second lytic cycle (120 h) with or without aTC. Error bars represent the SEM of three technical replicates. The chloramphenicol EC<sub>50</sub> is unchanged by regulating levels of *PfFtsH1*, indicating that the observed hypersensitivity to actinonin upon knockdown of *PfFtsH1* is specific to actinonin and does not occur for all apicoplast drugs.

**Figure 4-Figure Supplement 1: Purification of *PfFtsH1*.** Purified samples were separated by SDS-PAGE and stained with Coomassie. Full-length product is 97 kDa.

**Table 1-Source Data 1: Antimalarial activity of inhibitors screened in this study.**

**Table 2-Source Data 2: Mutations discovered from whole-genome sequencing of actinonin-resistant *T. gondii*.**

**Table 3-Source Data 3: Oligonucleotide primers and plasmids used in this study.**

**Figure 1-Source Data 1: Numerical data for Figure 1 and Figure 1 Supplements.**

**Figure 2-Source Data 1: Numerical data for Figure 2 and Figure 2 Supplements.**

1256 **Figure 3-Source Data 1: Numerical data for Figure 3 and Figure 3 Supplements.**  
1257 **Figure 4-Source Data 1: Numerical data for Figure 4 and Figure 4 Supplements.**  
1258

**A**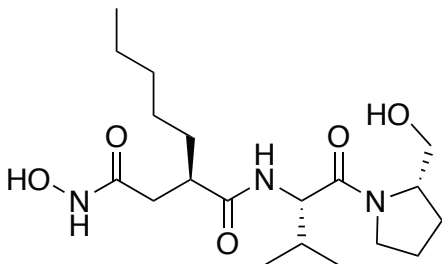**B**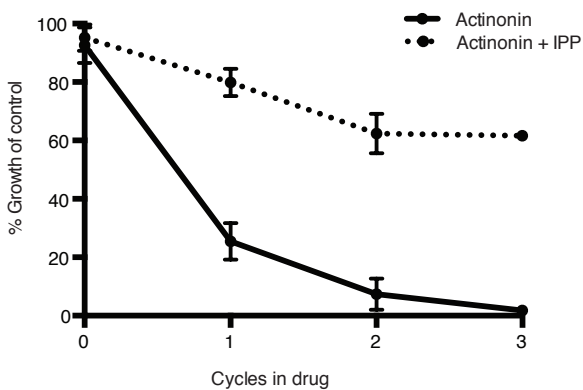**C**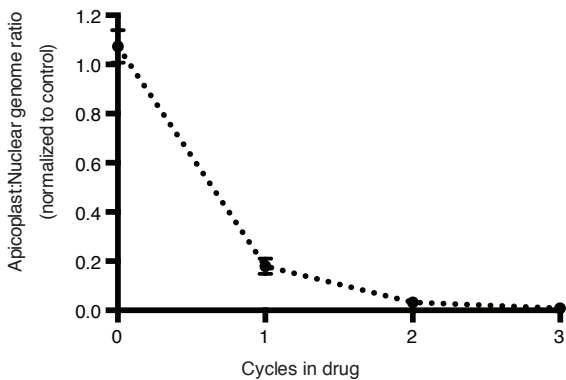**D**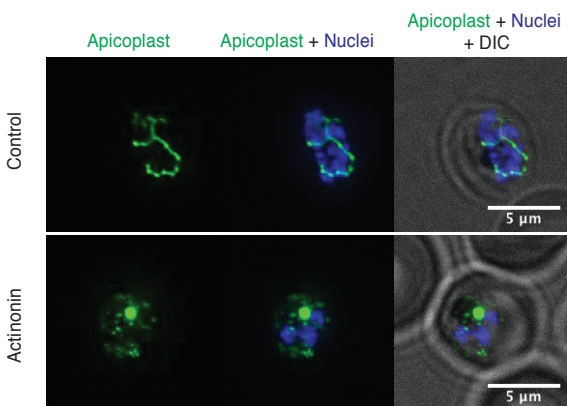

A

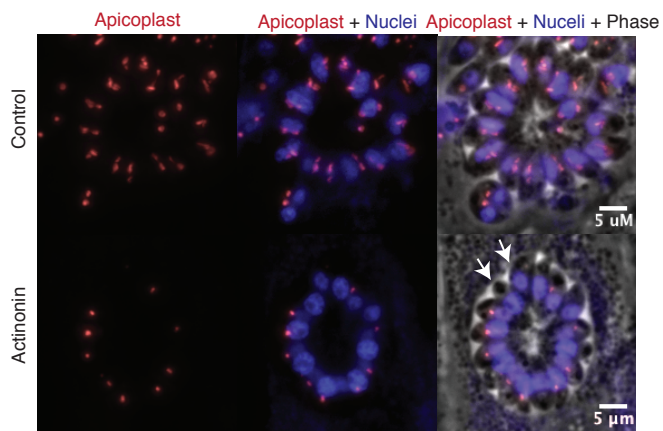

D

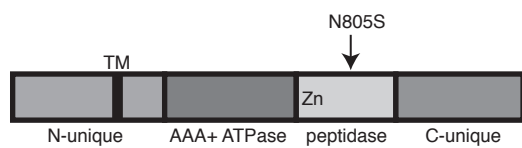

B

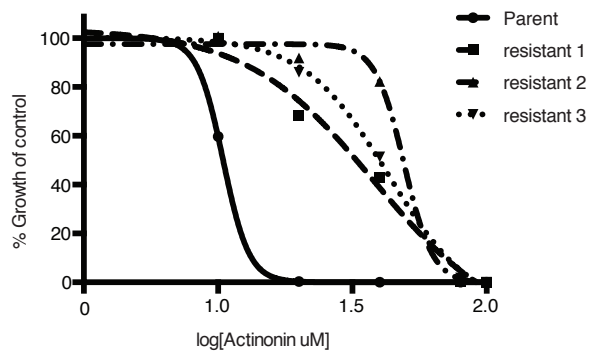

C

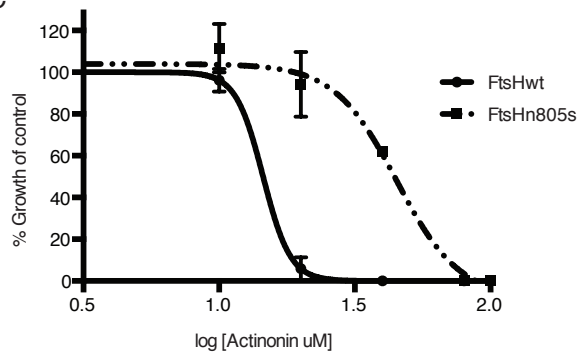

A

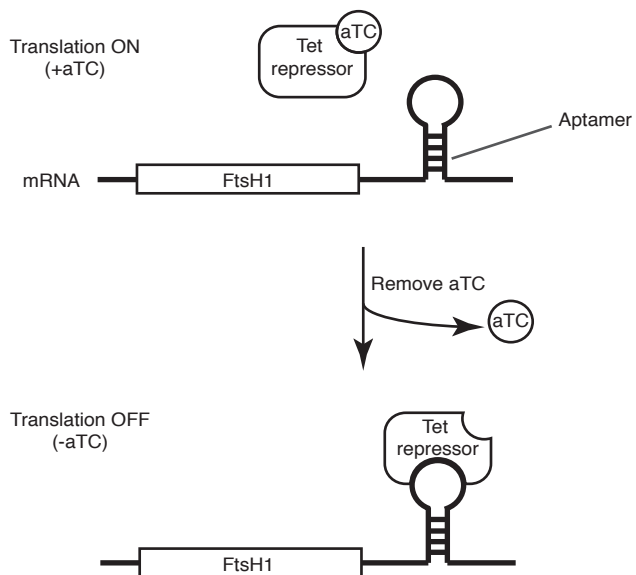

B

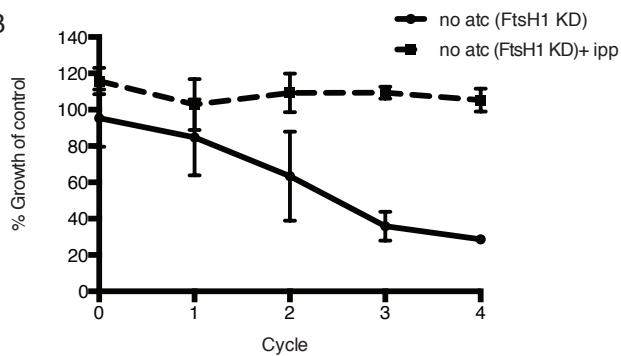

C

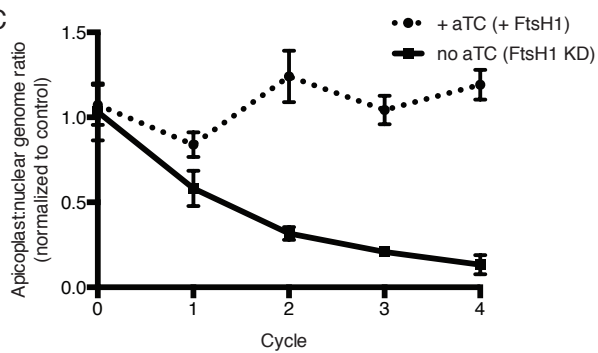

D

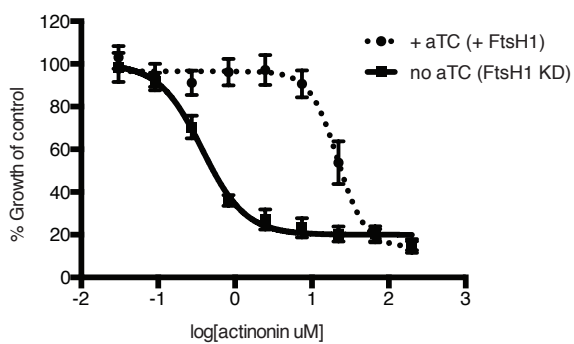



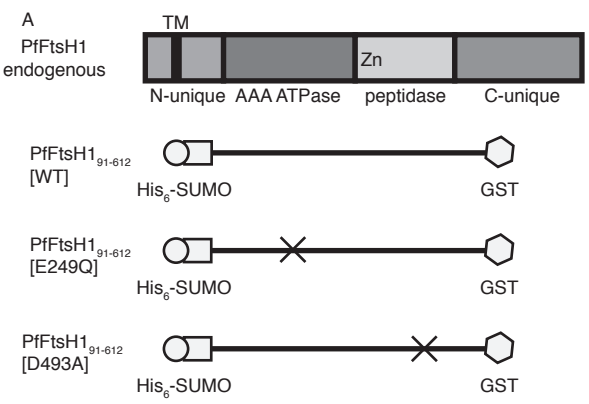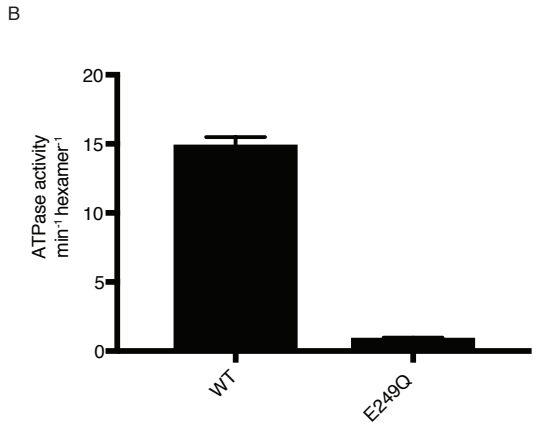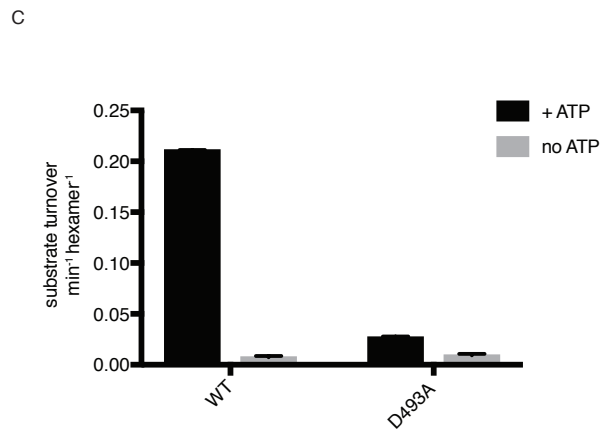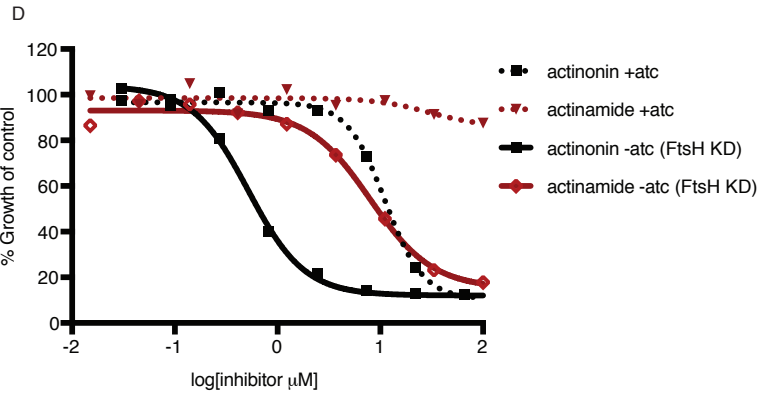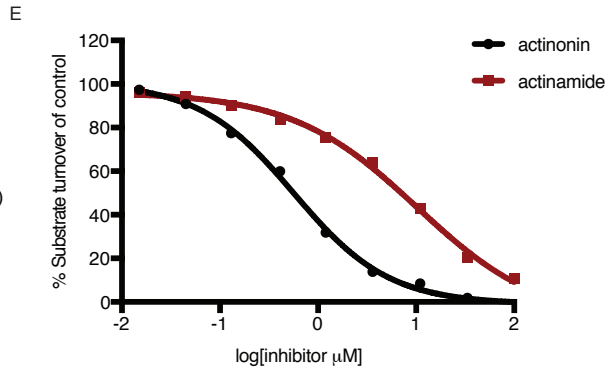

A

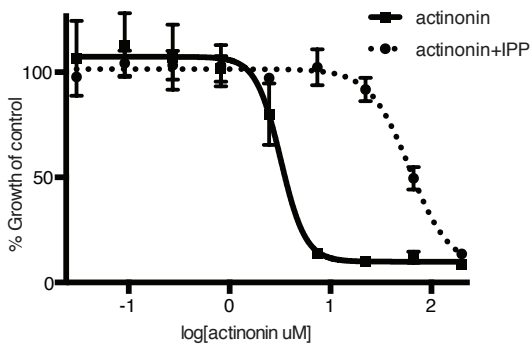

B

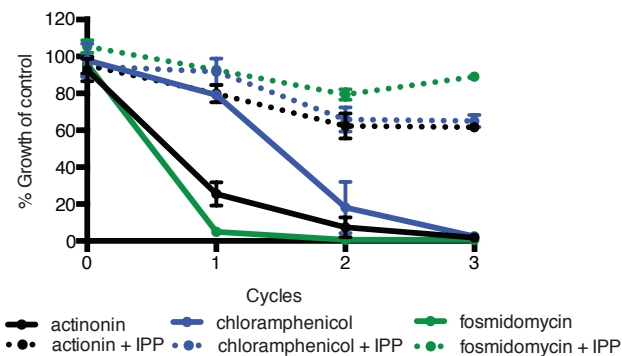

**A**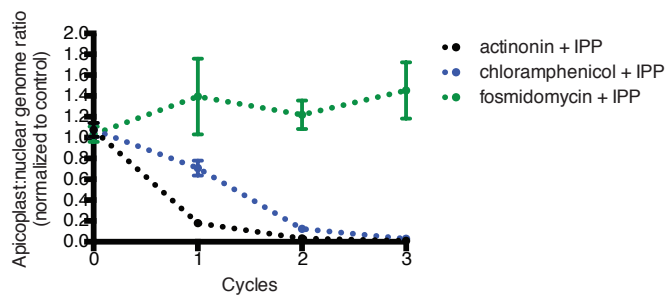**B**

Control + IPP

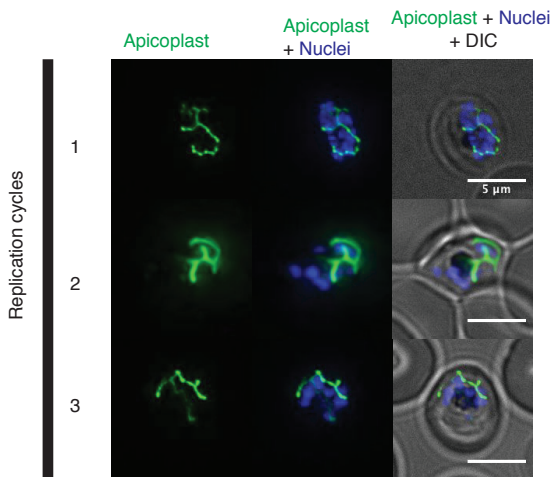**D**

Fosmidomycin + IPP

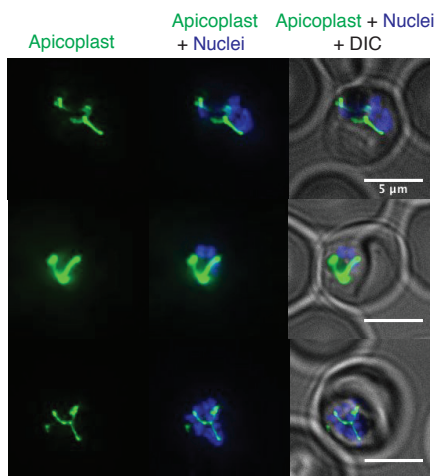**C**

Chloramphenicol + IPP

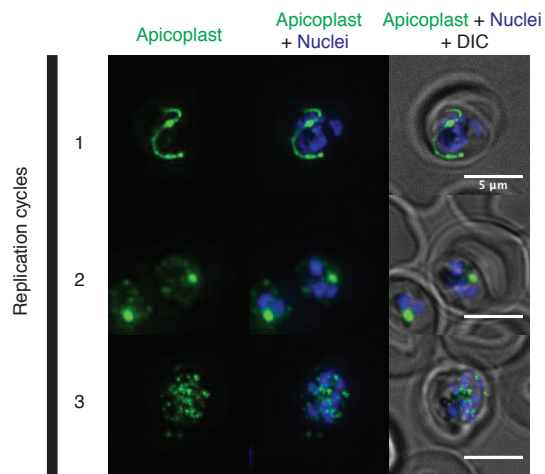**E**

Actinonin + IPP

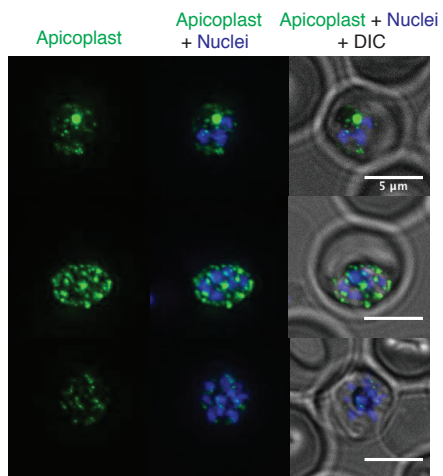

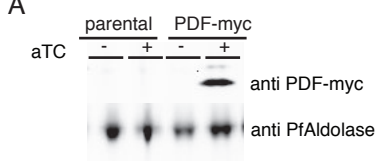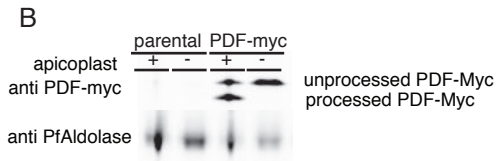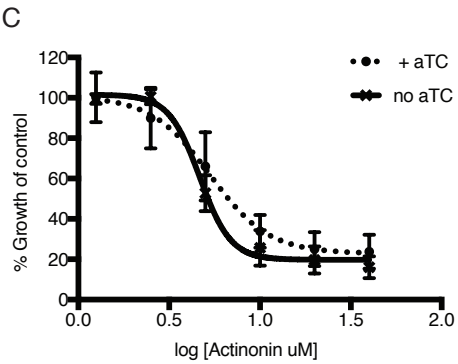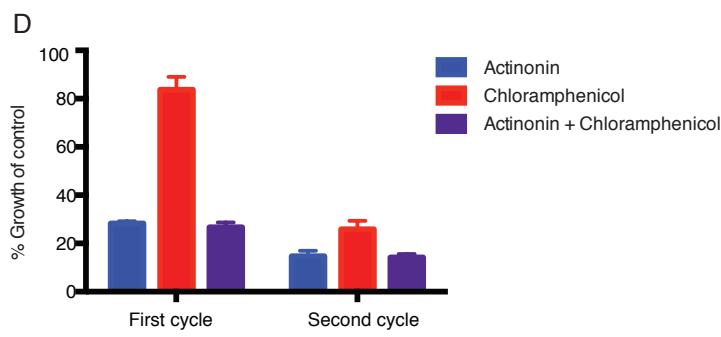

A

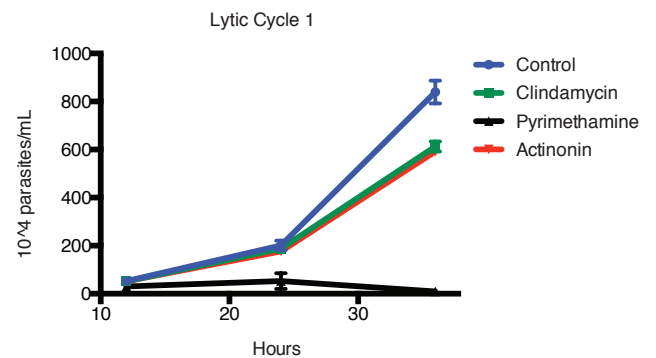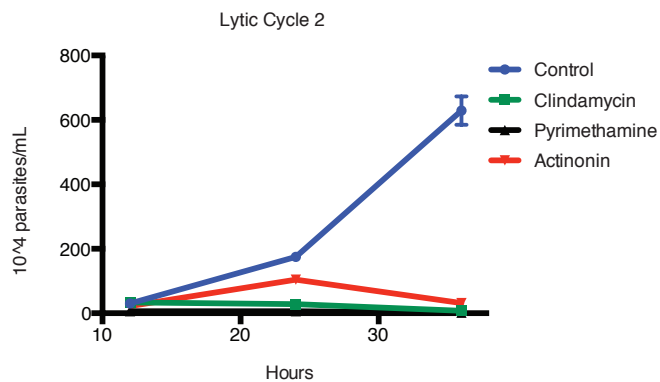

B

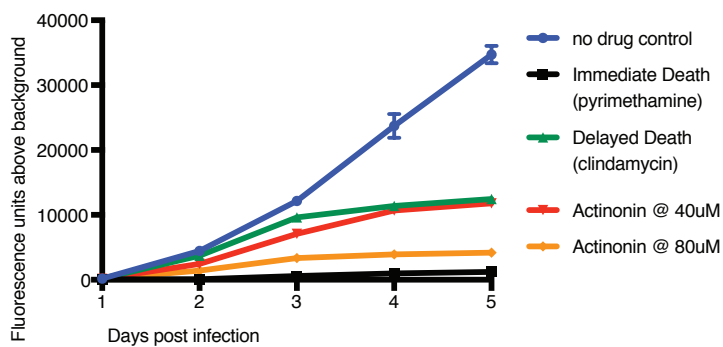

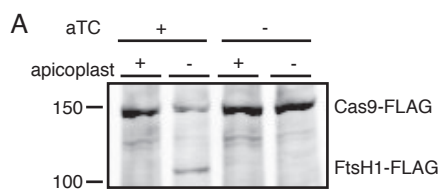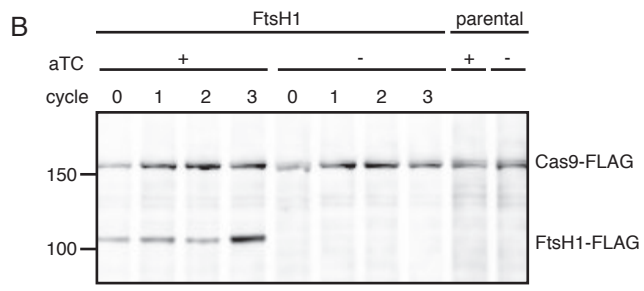



A

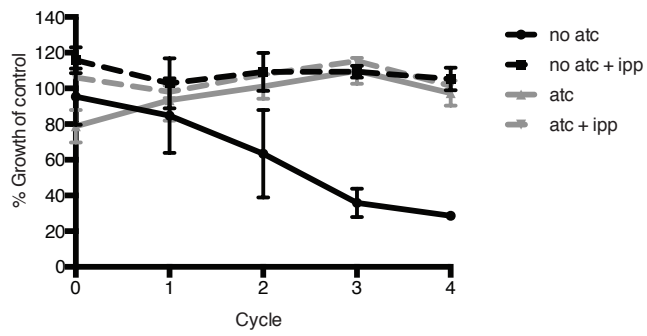

B

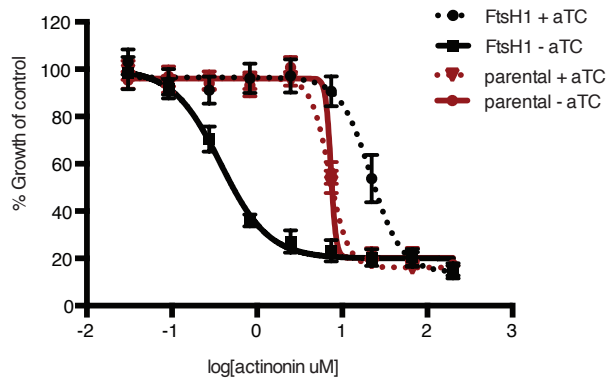

C

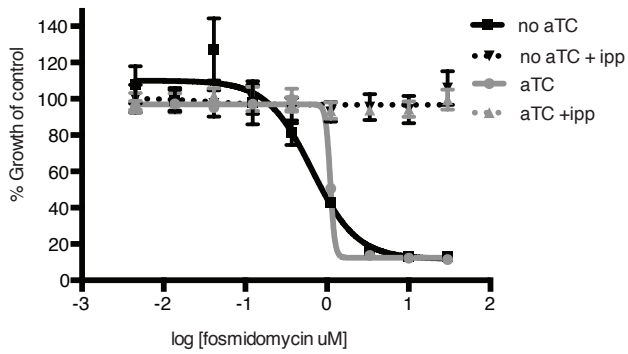

D

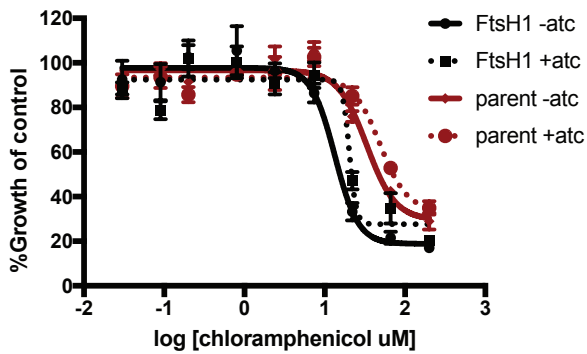

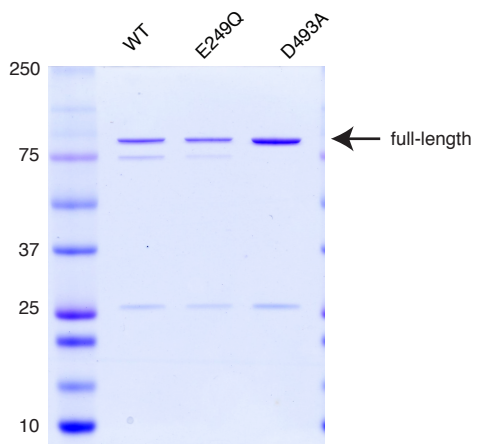

Source: http://biorxiv.org/content/10.1101/108910v3.full.pdf
